# Supplementary material for: The Causal Role of Fruit and Vegetable Intake in Multiple Diseases and Disorders: A Systematic Review and Meta-analysis of Mendelian Randomization Studies
Source: Research Square preprint supplement (doi:10.21203/rs.3.rs-8641613/v1), 2026-01-22
Supplement: Supplementary file 1 [file ec621082aeb29b5523240b6b.docx]

**Supplementary material to The Causal Role of Fruit and Vegetable Intake on Multiple Diseases and Disorders: A Systematic Review and Meta-analysis of Mendelian Randomization Studies**

| **Supplemental figure/table** | **Page** |
| --- | --- |
| **Table S1.** Genetic variants used as instrumental variables in our de novo Mendelian randomization analyses | 2 |
| **Table S2.** Mendelian randomization studies, meta-analysis results, and certainty of evidence ratings of dried fruit intake as exposure | 7 |
| **Table S3.** Mendelian randomization studies, meta-analysis results, and certainty of evidence ratings of fresh fruit intake as exposure | 16 |
| **Table S4.** Mendelian randomization studies, meta-analysis results, and certainty of evidence ratings of cooked vegetable intake as exposure | 26 |
| **Table S5.** Mendelian randomization studies, meta-analysis results, and certainty of evidence ratings of salad/raw vegetable intake as exposure | 34 |
| **Table S6.** Mendelian randomization studies, meta-analysis results, and certainty of evidence ratings of general fruit and vegetable intake as exposure | 42 |
| **Table S7.** Quality assessment results of included Mendelian randomization studies | 44 |
|  |  |

**Table S1. Genetic variants used as instrumental variables in our de novo Mendelian randomization analyses**

| **Exposure Name** | **SNP** | **Chromosome** | **Position** | **Reference Allele** | **Variant Allele** | **EAF** | **Beta** | **SE** | **P-value** | **Sample Size** | **R2** | **F Statistic** |
| --- | --- | --- | --- | --- | --- | --- | --- | --- | --- | --- | --- | --- |
| Dried Fruit | rs10740991 | 10 | 22058137 | C | G | 0.717606 | 0.016739 | 0.001857 | 2.00E-19 | 421764 | 1.93E-04 | 81.23297 |
| Dried Fruit | rs429358 | 19 | 45411941 | C | T | 0.154208 | 0.019945 | 0.002314 | 6.70E-18 | 421764 | 1.76E-04 | 74.31256 |
| Dried Fruit | rs11772627 | 7 | 2109821 | C | G | 0.18202 | 0.018334 | 0.002171 | 3.00E-17 | 421764 | 1.69E-04 | 71.31639 |
| Dried Fruit | rs3101339 | 1 | 72748669 | C | A | 0.603285 | 0.01426 | 0.001705 | 6.20E-17 | 421764 | 1.66E-04 | 69.90778 |
| Dried Fruit | rs10896126 | 11 | 66292908 | G | A | 0.303582 | -0.01501 | 0.001819 | 1.60E-16 | 421764 | 1.61E-04 | 68.06869 |
| Dried Fruit | rs34162196 | 14 | 22038125 | T | C | 0.101001 | -0.02236 | 0.002772 | 7.10E-16 | 421764 | 1.54E-04 | 65.09778 |
| Dried Fruit | rs746868 | 6 | 31540429 | G | C | 0.614662 | -0.01291 | 0.001715 | 5.20E-14 | 421764 | 1.34E-04 | 56.65843 |
| Dried Fruit | rs4269101 | 3 | 18763543 | G | T | 0.718948 | -0.01381 | 0.001859 | 1.10E-13 | 421764 | 1.31E-04 | 55.17269 |
| Dried Fruit | rs9385269 | 6 | 98547979 | T | C | 0.524565 | 0.012067 | 0.001682 | 7.20E-13 | 421764 | 1.22E-04 | 51.48207 |
| Dried Fruit | rs4800488 | 18 | 21117571 | A | C | 0.489858 | 0.011984 | 0.001672 | 7.70E-13 | 421764 | 1.22E-04 | 51.36788 |
| Dried Fruit | rs4149513 | 2 | 1.01E+08 | A | G | 0.493537 | 0.01173 | 0.001671 | 2.20E-12 | 421764 | 1.17E-04 | 49.25388 |
| Dried Fruit | rs3764002 | 12 | 1.09E+08 | T | C | 0.261416 | 0.013122 | 0.001901 | 5.10E-12 | 421764 | 1.13E-04 | 47.65292 |
| Dried Fruit | rs2328887 | 6 | 25430149 | C | T | 0.899467 | 0.018948 | 0.002776 | 8.80E-12 | 421764 | 1.10E-04 | 46.58811 |
| Dried Fruit | rs11811826 | 1 | 2.05E+08 | A | T | 0.224231 | 0.013218 | 0.002006 | 4.40E-11 | 421764 | 1.03E-04 | 43.42533 |
| Dried Fruit | rs7808471 | 7 | 1.33E+08 | C | T | 0.322136 | -0.01154 | 0.001786 | 1.10E-10 | 421764 | 9.89E-05 | 41.71989 |
| Dried Fruit | rs11037497 | 11 | 43622423 | C | G | 0.446175 | 0.01044 | 0.001684 | 5.70E-10 | 421764 | 9.11E-05 | 38.412 |
| Dried Fruit | rs7599488 | 2 | 60718347 | T | C | 0.426408 | -0.01042 | 0.001687 | 6.70E-10 | 421764 | 9.03E-05 | 38.10416 |
| Dried Fruit | rs75641275 | 1 | 98327133 | C | A | 0.143372 | -0.01416 | 0.002385 | 2.90E-09 | 421764 | 8.36E-05 | 35.25039 |
| Dried Fruit | rs1622515 | 11 | 95523433 | G | A | 0.484704 | 0.009917 | 0.001671 | 2.90E-09 | 421764 | 8.35E-05 | 35.23254 |
| Dried Fruit | rs62084586 | 17 | 56419228 | C | T | 0.165729 | 0.013395 | 0.002262 | 3.20E-09 | 421764 | 8.32E-05 | 35.0731 |
| Dried Fruit | rs2533273 | 7 | 1.53E+08 | A | C | 0.48453 | -0.00988 | 0.001677 | 3.90E-09 | 421764 | 8.22E-05 | 34.67971 |
| Dried Fruit | rs10026792 | 4 | 2862190 | A | G | 0.290404 | 0.010847 | 0.001842 | 3.90E-09 | 421764 | 8.22E-05 | 34.66239 |
| Dried Fruit | rs7829800 | 8 | 1.44E+08 | G | A | 0.671041 | -0.01045 | 0.001787 | 5.10E-09 | 421764 | 8.10E-05 | 34.16899 |
| Dried Fruit | rs17175518 | 18 | 57850583 | A | C | 0.232775 | 0.011496 | 0.001975 | 5.90E-09 | 421764 | 8.03E-05 | 33.87762 |
| Dried Fruit | rs1582322 | 16 | 52105988 | G | A | 0.604805 | 0.009943 | 0.001716 | 6.80E-09 | 421764 | 7.96E-05 | 33.58824 |
| Dried Fruit | rs11720884 | 3 | 43941406 | G | A | 0.250137 | 0.01118 | 0.001936 | 7.60E-09 | 421764 | 7.91E-05 | 33.3623 |
| Dried Fruit | rs57499472 | 3 | 1.47E+08 | C | T | 0.404131 | 0.009912 | 0.001719 | 8.10E-09 | 421764 | 7.89E-05 | 33.26248 |
| Dried Fruit | rs72720396 | 1 | 91191582 | G | A | 0.229157 | 0.011427 | 0.001985 | 8.70E-09 | 421764 | 7.85E-05 | 33.12272 |
| Dried Fruit | rs7582086 | 2 | 60231826 | T | G | 0.468273 | -0.00963 | 0.001674 | 8.80E-09 | 421764 | 7.84E-05 | 33.08863 |
| Dried Fruit | rs1797235 | 15 | 47821612 | C | G | 0.374623 | -0.01002 | 0.001742 | 8.90E-09 | 421764 | 7.84E-05 | 33.07628 |
| Dried Fruit | rs7916868 | 10 | 64988931 | T | A | 0.503499 | 0.009607 | 0.001672 | 9.10E-09 | 421764 | 7.83E-05 | 33.03023 |
| Dried Fruit | rs261809 | 1 | 2.41E+08 | G | A | 0.540636 | -0.00963 | 0.001679 | 9.80E-09 | 421764 | 7.80E-05 | 32.88613 |
| Dried Fruit | rs11586016 | 1 | 44031793 | C | G | 0.371004 | 0.009878 | 0.00173 | 1.10E-08 | 421764 | 7.73E-05 | 32.5905 |
| Dried Fruit | rs893856 | 10 | 1.27E+08 | A | G | 0.148988 | -0.01336 | 0.002349 | 1.30E-08 | 421764 | 7.67E-05 | 32.34647 |
| Dried Fruit | rs8081370 | 17 | 1373612 | T | C | 0.910232 | -0.01667 | 0.002938 | 1.40E-08 | 421764 | 7.63E-05 | 32.18142 |
| Dried Fruit | rs4140799 | 14 | 72170969 | A | G | 0.531856 | 0.009457 | 0.001678 | 1.80E-08 | 421764 | 7.53E-05 | 31.74301 |
| Dried Fruit | rs1648404 | 4 | 37175523 | T | C | 0.476112 | 0.009416 | 0.001674 | 1.80E-08 | 421764 | 7.50E-05 | 31.65487 |
| Dried Fruit | rs17184707 | 2 | 1.66E+08 | T | C | 0.212811 | -0.01144 | 0.00204 | 2.10E-08 | 421764 | 7.45E-05 | 31.43407 |
| Dried Fruit | rs10129747 | 14 | 77433198 | G | A | 0.530254 | 0.009359 | 0.001681 | 2.60E-08 | 421764 | 7.35E-05 | 30.98782 |
| Dried Fruit | rs12137234 | 1 | 72270797 | T | C | 0.303772 | 0.010205 | 0.001837 | 2.80E-08 | 421764 | 7.31E-05 | 30.84666 |
| Dried Fruit | rs862227 | 16 | 73602926 | G | A | 0.458327 | -0.00916 | 0.001672 | 4.30E-08 | 421764 | 7.12E-05 | 30.03012 |
| Dried Fruit | rs11632215 | 15 | 45319982 | C | A | 0.120179 | -0.01414 | 0.002584 | 4.40E-08 | 421764 | 7.10E-05 | 29.96285 |
| Dried Fruit | rs11152349 | 18 | 60233646 | A | G | 0.302856 | 0.009912 | 0.001818 | 4.90E-08 | 421764 | 7.05E-05 | 29.73987 |
| Fresh Fruit | rs10249294 | 7 | 1.44E+08 | A | G | 0.372973 | 0.019564 | 0.001263 | 4.10E-54 | 446462 | 5.37E-04 | 239.9397 |
| Fresh Fruit | rs1620977 | 1 | 72729142 | G | A | 0.730517 | -0.01317 | 0.001378 | 1.10E-21 | 446462 | 2.05E-04 | 91.45257 |
| Fresh Fruit | rs994270 | 6 | 51187787 | G | C | 0.235126 | 0.013259 | 0.001444 | 4.20E-20 | 446462 | 1.89E-04 | 84.31805 |
| Fresh Fruit | rs10828266 | 10 | 22098701 | G | A | 0.715634 | 0.012364 | 0.001357 | 8.10E-20 | 446462 | 1.86E-04 | 83.02291 |
| Fresh Fruit | rs34162196 | 14 | 22038125 | T | C | 0.1008 | -0.01814 | 0.00203 | 4.00E-19 | 446462 | 1.79E-04 | 79.88997 |
| Fresh Fruit | rs862227 | 16 | 73602926 | G | A | 0.457858 | -0.01015 | 0.001224 | 1.10E-16 | 446462 | 1.54E-04 | 68.70251 |
| Fresh Fruit | rs2048522 | 18 | 44800515 | T | A | 0.434968 | 0.009563 | 0.001248 | 1.80E-14 | 446462 | 1.32E-04 | 58.73752 |
| Fresh Fruit | rs28479795 | 14 | 79943606 | T | C | 0.221473 | 0.011232 | 0.001473 | 2.50E-14 | 446462 | 1.30E-04 | 58.11314 |
| Fresh Fruit | rs73455661 | 18 | 57968685 | G | A | 0.279338 | 0.010294 | 0.001362 | 4.10E-14 | 446462 | 1.28E-04 | 57.10442 |
| Fresh Fruit | rs13072255 | 3 | 21038260 | C | A | 0.493966 | 0.00898 | 0.001224 | 2.10E-13 | 446462 | 1.21E-04 | 53.86676 |
| Fresh Fruit | rs2867113 | 2 | 651365 | A | G | 0.130942 | -0.01386 | 0.00196 | 1.50E-12 | 446462 | 1.12E-04 | 49.99668 |
| Fresh Fruit | rs739320 | 19 | 49261368 | C | T | 0.60575 | -0.009 | 0.001277 | 1.90E-12 | 446462 | 1.11E-04 | 49.63513 |
| Fresh Fruit | rs10838724 | 11 | 47527052 | T | G | 0.367992 | 0.009011 | 0.001283 | 2.10E-12 | 446462 | 1.11E-04 | 49.34428 |
| Fresh Fruit | rs1964272 | 19 | 46190268 | A | G | 0.48389 | 0.008304 | 0.001223 | 1.10E-11 | 446462 | 1.03E-04 | 46.13183 |
| Fresh Fruit | rs2143081 | 6 | 50782834 | A | G | 0.539822 | 0.008321 | 0.001229 | 1.30E-11 | 446462 | 1.03E-04 | 45.84402 |
| Fresh Fruit | rs2790688 | 1 | 1.54E+08 | T | C | 0.154068 | 0.011447 | 0.001696 | 1.50E-11 | 446462 | 1.02E-04 | 45.54437 |
| Fresh Fruit | rs11896330 | 2 | 60235568 | A | G | 0.632839 | -0.00845 | 0.001274 | 3.40E-11 | 446462 | 9.84E-05 | 43.91943 |
| Fresh Fruit | rs4953150 | 2 | 45157336 | T | C | 0.344088 | -0.00844 | 0.001293 | 6.60E-11 | 446462 | 9.55E-05 | 42.62079 |
| Fresh Fruit | rs62298288 | 4 | 59885755 | T | C | 0.433152 | 0.007918 | 0.001233 | 1.40E-10 | 446462 | 9.23E-05 | 41.20832 |
| Fresh Fruit | rs7554485 | 1 | 65945906 | C | T | 0.611539 | -0.00801 | 0.001254 | 1.70E-10 | 446462 | 9.14E-05 | 40.79324 |
| Fresh Fruit | rs12420070 | 11 | 63985628 | G | A | 0.363101 | 0.007973 | 0.00127 | 3.40E-10 | 446462 | 8.83E-05 | 39.43513 |
| Fresh Fruit | rs12044599 | 1 | 2.05E+08 | G | A | 0.21008 | 0.009421 | 0.001503 | 3.70E-10 | 446462 | 8.80E-05 | 39.27153 |
| Fresh Fruit | rs10192394 | 2 | 1.46E+08 | T | C | 0.528785 | -0.00766 | 0.001229 | 4.50E-10 | 446462 | 8.71E-05 | 38.87538 |
| Fresh Fruit | rs10064431 | 5 | 92950673 | C | T | 0.522495 | -0.00757 | 0.001224 | 6.00E-10 | 446462 | 8.58E-05 | 38.31131 |
| Fresh Fruit | rs1375566 | 3 | 85642479 | A | G | 0.627412 | -0.00783 | 0.001266 | 6.10E-10 | 446462 | 8.58E-05 | 38.28951 |
| Fresh Fruit | rs11085749 | 19 | 10961273 | A | G | 0.387076 | -0.00773 | 0.001255 | 7.10E-10 | 446462 | 8.51E-05 | 37.98711 |
| Fresh Fruit | rs7982441 | 13 | 55924013 | C | T | 0.731883 | -0.00841 | 0.001376 | 9.80E-10 | 446462 | 8.37E-05 | 37.37087 |
| Fresh Fruit | rs1051547 | 16 | 19279380 | C | T | 0.561537 | -0.00758 | 0.001242 | 1.10E-09 | 446462 | 8.34E-05 | 37.22385 |
| Fresh Fruit | rs12885598 | 14 | 32071665 | A | G | 0.596671 | 0.007515 | 0.001247 | 1.70E-09 | 446462 | 8.13E-05 | 36.30087 |
| Fresh Fruit | rs7123429 | 11 | 8866808 | G | C | 0.555255 | 0.007406 | 0.001233 | 1.90E-09 | 446462 | 8.09E-05 | 36.09937 |
| Fresh Fruit | rs1866823 | 8 | 57436577 | A | G | 0.544469 | 0.007431 | 0.001241 | 2.10E-09 | 446462 | 8.04E-05 | 35.8762 |
| Fresh Fruit | rs149449 | 5 | 95902093 | A | G | 0.489167 | 0.007289 | 0.001221 | 2.40E-09 | 446462 | 7.99E-05 | 35.65566 |
| Fresh Fruit | rs817223 | 2 | 1.04E+08 | C | T | 0.481314 | -0.00727 | 0.001223 | 2.80E-09 | 446462 | 7.91E-05 | 35.30442 |
| Fresh Fruit | rs139042899 | 17 | 58443095 | C | A | 0.013469 | 0.035995 | 0.006081 | 3.20E-09 | 446462 | 7.85E-05 | 35.03691 |
| Fresh Fruit | rs1356292 | 3 | 1.86E+08 | T | C | 0.807546 | 0.009175 | 0.001553 | 3.50E-09 | 446462 | 7.81E-05 | 34.89053 |
| Fresh Fruit | rs62051554 | 16 | 72826387 | A | G | 0.108545 | 0.011612 | 0.001981 | 4.60E-09 | 446462 | 7.69E-05 | 34.34327 |
| Fresh Fruit | rs11032362 | 11 | 33759092 | A | G | 0.090976 | 0.012393 | 0.002123 | 5.30E-09 | 446462 | 7.63E-05 | 34.06327 |
| Fresh Fruit | rs4744240 | 9 | 96218194 | T | C | 0.330797 | 0.00757 | 0.001299 | 5.70E-09 | 446462 | 7.60E-05 | 33.94593 |
| Fresh Fruit | rs17049185 | 2 | 58072660 | T | G | 0.267872 | 0.00804 | 0.00139 | 7.30E-09 | 446462 | 7.49E-05 | 33.44435 |
| Fresh Fruit | rs11248509 | 10 | 1.25E+08 | T | A | 0.371237 | 0.00733 | 0.001268 | 7.40E-09 | 446462 | 7.48E-05 | 33.41416 |
| Fresh Fruit | rs12536253 | 7 | 1.28E+08 | C | G | 0.24901 | -0.00816 | 0.001416 | 8.30E-09 | 446462 | 7.44E-05 | 33.20468 |
| Fresh Fruit | rs559734 | 1 | 97304868 | C | G | 0.711817 | 0.007768 | 0.001361 | 1.10E-08 | 446462 | 7.30E-05 | 32.58737 |
| Fresh Fruit | rs4302893 | 9 | 1734863 | A | G | 0.334189 | 0.007389 | 0.0013 | 1.30E-08 | 446462 | 7.24E-05 | 32.32273 |
| Fresh Fruit | rs2093654 | 9 | 5780121 | G | A | 0.388133 | 0.007129 | 0.001259 | 1.50E-08 | 446462 | 7.18E-05 | 32.07772 |
| Fresh Fruit | rs9517948 | 13 | 1.01E+08 | T | C | 0.451352 | 0.006953 | 0.001233 | 1.70E-08 | 446462 | 7.12E-05 | 31.80743 |
| Fresh Fruit | rs72974263 | 2 | 2.25E+08 | T | C | 0.318282 | 0.007387 | 0.001312 | 1.80E-08 | 446462 | 7.10E-05 | 31.67902 |
| Fresh Fruit | rs6475724 | 9 | 23274223 | T | C | 0.727296 | 0.007722 | 0.001374 | 1.90E-08 | 446462 | 7.07E-05 | 31.5796 |
| Fresh Fruit | rs10271924 | 7 | 1.53E+08 | T | C | 0.492595 | -0.00705 | 0.001256 | 2.00E-08 | 446462 | 7.05E-05 | 31.48147 |
| Fresh Fruit | rs8095324 | 18 | 24131659 | G | A | 0.404041 | -0.00695 | 0.001249 | 2.70E-08 | 446462 | 6.93E-05 | 30.92716 |
| Fresh Fruit | rs329277 | 7 | 35080931 | G | T | 0.486036 | 0.006827 | 0.001229 | 2.80E-08 | 446462 | 6.91E-05 | 30.85221 |
| Fresh Fruit | rs7818437 | 8 | 10209623 | C | T | 0.235903 | -0.00805 | 0.001453 | 3.00E-08 | 446462 | 6.88E-05 | 30.70109 |
| Fresh Fruit | rs12780952 | 10 | 1.08E+08 | A | G | 0.286382 | 0.007475 | 0.001354 | 3.40E-08 | 446462 | 6.83E-05 | 30.49196 |
| Fresh Fruit | rs7898861 | 10 | 65319678 | C | T | 0.485977 | -0.00673 | 0.001223 | 3.80E-08 | 446462 | 6.78E-05 | 30.2504 |
| Fresh Fruit | rs586346 | 6 | 31875712 | C | T | 0.635353 | -0.00692 | 0.001266 | 4.50E-08 | 446462 | 6.70E-05 | 29.90025 |
| Fresh Fruit | rs78537042 | 21 | 33068937 | A | C | 0.086801 | -0.01193 | 0.002184 | 4.80E-08 | 446462 | 6.68E-05 | 29.80916 |
| Cooked Vegetable | rs12629972 | 3 | 25121444 | C | T | 0.588311 | 0.0118 | 0.001591 | 1.20E-13 | 448651 | 1.23E-04 | 55.01758 |
| Cooked Vegetable | rs838133 | 19 | 49259529 | G | A | 0.549575 | 0.011688 | 0.001615 | 4.50E-13 | 448651 | 1.17E-04 | 52.39638 |
| Cooked Vegetable | rs10156602 | 9 | 96345328 | G | A | 0.361369 | 0.011006 | 0.001637 | 1.80E-11 | 448651 | 1.01E-04 | 45.21206 |
| Cooked Vegetable | rs28711392 | 11 | 13349559 | C | T | 0.367132 | -0.01075 | 0.001632 | 4.60E-11 | 448651 | 9.66E-05 | 43.345 |
| Cooked Vegetable | rs4851029 | 2 | 1.04E+08 | G | T | 0.526969 | 0.010174 | 0.001564 | 7.80E-11 | 448651 | 9.43E-05 | 42.30741 |
| Cooked Vegetable | rs1421085 | 16 | 53800954 | C | T | 0.40346 | 0.010332 | 0.001591 | 8.30E-11 | 448651 | 9.40E-05 | 42.19354 |
| Cooked Vegetable | rs2052063 | 10 | 1.18E+08 | T | C | 0.515902 | -0.00946 | 0.001568 | 1.60E-09 | 448651 | 8.11E-05 | 36.38485 |
| Cooked Vegetable | rs2844672 | 6 | 31005139 | A | G | 0.624125 | -0.00964 | 0.001609 | 2.10E-09 | 448651 | 8.00E-05 | 35.90141 |
| Cooked Vegetable | rs2102738 | 2 | 1.73E+08 | C | A | 0.172403 | -0.01216 | 0.002083 | 5.30E-09 | 448651 | 7.59E-05 | 34.06615 |
| Cooked Vegetable | rs2252508 | 1 | 1.54E+08 | G | A | 0.480256 | 0.009102 | 0.001562 | 5.70E-09 | 448651 | 7.57E-05 | 33.94941 |
| Cooked Vegetable | rs10161952 | 13 | 59474383 | C | A | 0.31274 | -0.00958 | 0.001686 | 1.30E-08 | 448651 | 7.20E-05 | 32.28899 |
| Cooked Vegetable | rs12550717 | 8 | 10266706 | A | G | 0.372413 | 0.009187 | 0.001619 | 1.40E-08 | 448651 | 7.18E-05 | 32.20363 |
| Cooked Vegetable | rs11138705 | 9 | 83121545 | C | G | 0.757204 | 0.010372 | 0.00183 | 1.40E-08 | 448651 | 7.16E-05 | 32.119 |
| Cooked Vegetable | rs349062 | 11 | 84788804 | C | G | 0.39275 | -0.0089 | 0.001598 | 2.50E-08 | 448651 | 6.92E-05 | 31.06004 |
| Cooked Vegetable | rs1816263 | 5 | 1.41E+08 | C | T | 0.280188 | 0.009581 | 0.001741 | 3.70E-08 | 448651 | 6.75E-05 | 30.29903 |
| Cooked Vegetable | rs34155012 | 22 | 48977215 | T | C | 0.227386 | 0.010558 | 0.001922 | 3.90E-08 | 448651 | 6.73E-05 | 30.17542 |
| Cooked Vegetable | rs28450747 | 4 | 42137653 | A | G | 0.23257 | -0.01016 | 0.001855 | 4.30E-08 | 448651 | 6.69E-05 | 30.01057 |
| Salad/Raw Vegetable | rs7619139 | 3 | 25110415 | A | T | 0.589193 | 0.012477 | 0.001451 | 8.00E-18 | 435435 | 1.70E-04 | 73.94938 |
| Salad/Raw Vegetable | rs790561 | 8 | 64618026 | G | A | 0.704134 | 0.012474 | 0.001562 | 1.40E-15 | 435435 | 1.46E-04 | 63.77566 |
| Salad/Raw Vegetable | rs3095337 | 6 | 30737591 | C | G | 0.203909 | -0.01262 | 0.001766 | 9.00E-13 | 435435 | 1.17E-04 | 51.05981 |
| Salad/Raw Vegetable | rs6482190 | 10 | 22037809 | G | A | 0.719408 | 0.011272 | 0.00159 | 1.40E-12 | 435435 | 1.15E-04 | 50.2416 |
| Salad/Raw Vegetable | rs17460017 | 5 | 1.38E+08 | T | A | 0.190124 | 0.011174 | 0.001813 | 7.20E-10 | 435435 | 8.72E-05 | 37.97264 |
| Salad/Raw Vegetable | rs62461186 | 7 | 77730153 | C | A | 0.179827 | -0.01134 | 0.001857 | 1.00E-09 | 435435 | 8.57E-05 | 37.30299 |
| Salad/Raw Vegetable | rs12203592 | 6 | 396321 | T | C | 0.219338 | -0.01029 | 0.001694 | 1.30E-09 | 435435 | 8.47E-05 | 36.86606 |
| Salad/Raw Vegetable | rs10819082 | 9 | 1.29E+08 | A | G | 0.66734 | -0.00916 | 0.001513 | 1.40E-09 | 435435 | 8.42E-05 | 36.67096 |
| Salad/Raw Vegetable | rs2194027 | 5 | 87822672 | A | T | 0.484664 | -0.00861 | 0.001436 | 2.00E-09 | 435435 | 8.26E-05 | 35.95028 |
| Salad/Raw Vegetable | rs7227822 | 18 | 38107825 | G | C | 0.517571 | -0.0084 | 0.001425 | 3.70E-09 | 435435 | 7.98E-05 | 34.7656 |
| Salad/Raw Vegetable | rs57221424 | 7 | 35215670 | G | C | 0.321733 | 0.008941 | 0.001533 | 5.50E-09 | 435435 | 7.81E-05 | 34.00446 |
| Salad/Raw Vegetable | rs1890012 | 13 | 54933682 | G | T | 0.19473 | -0.01043 | 0.001808 | 8.10E-09 | 435435 | 7.64E-05 | 33.25453 |
| Salad/Raw Vegetable | rs1052352 | 16 | 31195279 | T | C | 0.52355 | 0.008164 | 0.001426 | 1.00E-08 | 435435 | 7.53E-05 | 32.79692 |
| Salad/Raw Vegetable | rs12908495 | 15 | 97011280 | A | C | 0.242533 | -0.00935 | 0.001666 | 2.00E-08 | 435435 | 7.24E-05 | 31.5075 |
| Salad/Raw Vegetable | rs75248709 | 6 | 92348945 | T | C | 0.045947 | -0.01973 | 0.003528 | 2.20E-08 | 435435 | 7.19E-05 | 31.29196 |
| Salad/Raw Vegetable | rs1828021 | 4 | 63740518 | G | A | 0.499269 | 0.007984 | 0.00143 | 2.40E-08 | 435435 | 7.16E-05 | 31.16875 |
| Salad/Raw Vegetable | rs9427220 | 1 | 1.54E+08 | T | A | 0.554661 | -0.00801 | 0.001442 | 2.80E-08 | 435435 | 7.08E-05 | 30.83517 |
| Salad/Raw Vegetable | rs8130508 | 21 | 19049865 | A | G | 0.289686 | 0.00874 | 0.001578 | 3.00E-08 | 435435 | 7.05E-05 | 30.68069 |
| Salad/Raw Vegetable | rs4083969 | 1 | 2.32E+08 | G | C | 0.057217 | 0.017133 | 0.003115 | 3.80E-08 | 435435 | 6.95E-05 | 30.24846 |
| Salad/Raw Vegetable | rs7821179 | 8 | 83061099 | C | G | 0.846577 | -0.01082 | 0.001976 | 4.40E-08 | 435435 | 6.88E-05 | 29.96117 |
| Salad/Raw Vegetable | rs34186148 | 17 | 43854655 | C | G | 0.370054 | -0.00805 | 0.001475 | 4.80E-08 | 435435 | 6.84E-05 | 29.80024 |

**Table S2. Mendelian randomization studies, meta-analysis results, and certainty of evidence ratings of dried fruit intake as exposure**

| **Disease** | **Study** | **GWAS ID/Publication Link** | **Consortium** | **Cases** | **Non-cases** | **SNPs** | **IVW** | | |  | **Weighted median** | | |  | **MR- Egger** | | | ***P*-value for meta-analysis** | **Evidence rating** |
| --- | --- | --- | --- | --- | --- | --- | --- | --- | --- | --- | --- | --- | --- | --- | --- | --- | --- | --- | --- |
| **MUSCULOSKELETAL SYSTEM** |  |  |  |  |  |  | **OR** | **LB** | **UB** |  | **OR** | **LB** | **UB** |  | **OR** | **LB** | **UB** |  |
| **Knee osteoarthritis** | Liang/2024 | ebi-a-GCST90038686 | European Bioinformatics Institute | 39515 | 445083 | 41 | 0.981 | 0.963 | 0.999 |  | 0.974 | 0.951 | 0.997 |  | 0.980 | 0.900 | 1.066 |  | Robust evidence |
|  | Lv/2024 | ebi-a-GCST007090 | European Bioinformatics Institute | 24955 | 378169 | 30 | 0.460 | 0.300 | 0.710 |  | 0.440 | 0.260 | 0.730 |  | 0.480 | 0.060 | 4.040 |  |  |
|  |  | **Meta-analysis** |  |  |  |  | 0.711 | 0.608 | 0.832 |  | 0.711 | 0.589 | 0.858 |  | 0.867 | 0.463 | 1.621 | <0.001 |  |
| **Hip Osteoarthritis** | Xie/2023 | https://www.cell.com/cell/fulltext/S0092-8674(21)00941-7 | Genetics of Osteoarthritis |  |  | 155 | 0.975 | 0.799 | 1.189 |  | 0.880 | 0.687 | 1.127 |  | 0.980 | 0.450 | 2.135 |  | Insufficient evidence |
| **Spinal Osteoarthritis** | Xie/2023 | https://www.cell.com/cell/fulltext/S0092-8674(21)00941-7 | Genetics of Osteoarthritis |  |  | 156 | 0.727 | 0.594 | 0.889 |  | 0.687 | 0.521 | 0.906 |  | 1.046 | 0.478 | 2.288 |  | Robust evidence |
| **Hand Osteoarthritis** | Xie/2023 | https://www.cell.com/cell/fulltext/S0092-8674(21)00941-7 | Genetics of Osteoarthritis |  |  | 157 | 0.892 | 0.699 | 1.139 |  | 0.888 | 0.637 | 1.237 |  | 1.196 | 0.455 | 3.144 |  | Insufficient evidence |
| **Frozen Shoulder** | Deng/2023 | ebi-a-GCST90000512 | European Bioinformatics Institute |  |  | 43 | 0.520 | 0.340 | 0.800 |  | 0.450 | 0.250 | 0.830 |  | 0.400 | 0.050 | 2.950 |  | Robust evidence |
| **Chronic Knee Pain** | Zhou/2023 | ukb-b-8906 | UK Biobank | 7691 | 20979 | 29 | 0.970 | 0.915 | 1.029 |  | 0.951 | 0.862 | 1.049 |  |  |  |  |  | Insufficient evidence |
| **Chronic Hip Pain** | Zhou/2023 | ukb-b-133 | UK Biobank | 40152 | 11364 | 29 | 0.932 | 0.845 | 1.028 |  | 0.923 | 0.821 | 1.038 |  |  |  |  |  | Insufficient evidence |
| **Chronic Back Pain** | Zhou/2023 | ukb-b-8463 | UK Biobank | 80588 | 36816 | 29 | 0.951 | 0.897 | 1.009 |  | 0.942 | 0.854 | 1.039 |  |  |  |  |  | Insufficient evidence |
| **Chronic Neck/ShoulderPain** | Zhou/2023 | ukb-b-16118 | UK Biobank | 72887 | 32509 | 29 | 0.951 | 0.897 | 1.009 |  | 0.980 | 0.889 | 1.081 |  |  |  |  |  | Insufficient evidence |
| **Low Back Pain** | Huang/2023b | ukb-d-M13_LOWBACKPAIN | UK Biobank | 5423 | 355771 | 41 | 0.984 | 0.976 | 0.992 |  | 0.985 | 0.974 | 0.996 |  | 0.961 | 0.926 | 0.996 |  | Robust evidence |
|  | Huang/2023b | finn-b-M13_LOWBACKPAIN | Finngen | 13178 | 164682 | 41 | 0.435 | 0.287 | 0.659 |  | 0.561 | 0.325 | 0.967 |  | 0.078 | 0.013 | 0.479 |  |  |
| **Multi-site Chronic Pain** | Zhou/2023 | 31194737 |  |  |  | 29 | 0.803 | 0.700 | 0.921 |  | 0.932 | 0.813 | 1.070 |  |  |  |  |  | Suggestive evidence |
| **NERVOUS SYSTEM** |  |  |  |  |  |  |  |  |  |  |  |  |  |  |  |  |  |  |  |
| **Migraine** | Liu/2023 |  | Finngen |  |  | 119 | 0.943 | 0.700 | 1.270 |  | 1.140 | 0.780 | 1.680 |  | 1.980 | 0.700 | 5.580 |  | Insufficient evidence |
| **Migraine with Aura** | Liu/2023 |  | Finngen |  |  | 119 | 1.358 | 0.880 | 2.090 |  | 1.440 | 0.820 | 2.560 |  | 2.640 | 0.570 | 12.19 |  | Insufficient evidence |
| **Migraine without Aura** | Liu/2023 |  | Finngen |  |  | 119 | 0.870 | 0.590 | 1.280 |  | 0.580 | 0.320 | 1.050 |  | 1.490 | 0.380 | 5.800 |  | Insufficient evidence |
| **Chronic Headache** | Zhou/2023 | ukb-b-13092 | UK Biobank | 41719 | 4955 | 29 | 0.951 | 0.880 | 1.029 |  | 0.970 | 0.863 | 1.092 |  |  |  |  |  | Insufficient evidence |
| **Amyotrophic Lateral Sclerosis** | Jing/2024 | ebi-a-GCST90027164 | European Bioinformatics Institute | 27205 | 110881 | 37 | 0.938 | 0.606 | 1.454 |  | 1.293 | 0.770 | 2.172 |  | 3.780 | 0.511 | 27.94 |  | Insufficient evidence |
| **Parkinson’s Disease** | Zeng/2024 | ieu-b-7 | International Parkinson's Disease Genomics Consortium |  |  | 41 | 2.019 | 1.052 | 3.875 |  | 1.371 | 0.606 | 3.106 |  | 0.923 | 0.048 | 17.78 |  | Suggestive evidence |
| **Alzheimer** | Liao/2024 | Finngen_R8_G6_ALZHEIMER | Finngen | 7759 | 33474 | 24 | 4.090 | 2.070 | 8.100 |  | 2.680 | 1.050 | 6.870 |  | 6.650 | 0.120 | 364.4 |  | Robust evidence |
| **Autism Spectrum Disorder** | Li/2024b | ieu-a-1185 | iPSYCH-PGC | 18382 | 27969 | 28 | 2.167 | 1.342 | 3.501 |  | 2.201 | 1.077 | 4.496 |  | 1.875 | 0.140 | 25.04 |  | Robust evidence |
|  | *De novo MR 2024* | finn-b-F5_AUTISM |  | 293 | 216829 | 39 | 4.112 | 0.224 | 75.531 |  | 0.952 | 0.024 | 37.13 |  | 0.131 | 0.000 | 58987 |  |  |
|  |  | **Meta-analysis** |  |  |  |  | 2.204 | 1.373 | 3.537 |  | 2.134 | 1.059 | 4.304 |  | 1.042 | 0.106 | 10.29 | 0.001 |  |
| **Major Depressive Disorder** | Liu/2023 |  | 23andMe_307k. UK Biobank. PGC_139k | 246363 | 561190 | 123 | 0.900 | 0.790 | 1.030 |  | 0.910 | 0.810 | 1.030 |  | 0.970 | 0.610 | 1.540 |  | Insufficient evidence |
| **Anxiety** | Liu/2023 |  | Integrative Psychiatric Research (iPSYCH) | 4584 | 19225 | 121 | 0.774 | 0.460 | 1.300 |  | 1.200 | 0.640 | 2.240 |  | 1.260 | 0.160 | 10.23 |  | Insufficient evidence |
| **Bipolar Disorder** | Li/2024 | ieu-b-5110 | PGC Bipolar Disorder Working Group of the Psychiatric Genomics Consortium | 41917 | 371549 | 15 | 2.371 | 1.181 | 4.760 |  | 1.564 | 0.784 | 3.119 |  | 0.710 | 0.040 | 12.61 |  | Insufficient evidence |
|  | *De novo MR 2024* | finn-b-F5_BIPO |  | 4501 | 192220 | 39 | 0.985 | 0.433 | 2.243 |  | 0.958 | 0.345 | 2.657 |  | 2.170 | 0.054 | 86.617 |  |  |
|  |  | **Meta-analysis** |  |  |  |  | 1.643 | 0.965 | 2.796 |  | 1.341 | 0.757 | 2.375 |  | 1.084 | 0.112 | 10.47 | 0.067 |  |
| **Insomnia** | Liu/2023 |  | UK Biobank | 397959 | 933051 | 116 | 0.734 | 0.650 | 0.830 |  | 0.720 | 0.630 | 0.830 |  | 0.650 | 0.430 | 1.000 |  | Robust evidence |
| **CARDIOVASCULAR SYSTEM** |  |  |  |  |  |  |  |  |  |  |  |  |  |  |  |  |  |  |  |
| **Hypertension** | Cai/2024 | Finn-b-I9_hypertension | Finngen | 95462 | 265626 | 43 | 0.510 | 0.370 | 0.700 |  | 0.460 | 0.320 | 0.660 |  | 0.150 | 0.040 | 0.580 |  | Robust evidence |
| **Coronary Artery Disease** | Zeng/2023 |  | CARDIoGRAMplusC4D | 60801 | 123504 | 28 | 0.680 | 0.440 | 1.050 |  |  |  |  |  |  |  |  |  | Suggestive evidence |
|  | *De novo MR 2024* | ebi-a-GCST90013868 |  |  |  | 35 | 0.469 | 0.245 | 0.898 |  | 0.487 | 0.303 | 0.780 |  | 16.78 | 1.046 | 269.2 |  |  |
|  |  | **Meta-analysis** |  |  |  |  | 0.606 | 0.422 | 0.870 |  |  |  |  |  |  |  |  | 0.007 |  |
| **Acute Myocardial Infarction** | Zeng/2023 |  | CARDIoGRAMplusC4D | 60801 | 123504 | 28 | 0.680 | 0.400 | 1.150 |  |  |  |  |  |  |  |  |  | Robust evidence |
|  | *De novo MR 2024* | finn-b-I9_MI |  | 12801 | 187840 | 39 | 0.540 | 0.303 | 0.960 |  | 0.480 | 0.239 | 0.963 |  | 1.007 | 0.076 | 13.30 |  |  |
|  |  | **Meta-analysis** |  |  |  |  | 0.612 | 0.415 | 0.903 |  |  |  |  |  |  |  |  | 0.013 |  |
| **Heart Failure** | Zeng/2023 |  | HERMES | 47309 | 930014 | 28 | 0.600 | 0.420 | 0.850 |  | 0.759 | 0.484 | 1.190 |  | 0.413 | 0.063 | 2.691 |  | Suggestive evidence |
| **Ischemic Stroke** | Zeng/2023 |  | MEGASTROKE | 34217 | 40463 | 28 | 0.450 | 0.290 | 0.700 |  | 0.602 | 0.341 | 1.064 |  | 0.335 | 0.032 | 3.475 |  | Suggestive evidence |
| **Large Artery Stroke** | Zeng/2023 |  | MEGASTROKE |  |  | 28 | 0.410 | 0.160 | 1.070 |  |  |  |  |  |  |  |  |  | Insufficient evidence |
| **Small Vessel Stroke** | Zeng/2023 |  | MEGASTROKE |  |  | 28 | 0.350 | 0.150 | 0.830 |  | 0.354 | 0.102 | 1.224 |  | 0.083 | 0.001 | 9.147 |  | Suggestive evidence |
| **Cardioembolic Stroke** | Zeng/2023 |  | MEGASTROKE |  |  | 28 | 0.850 | 0.410 | 1.740 |  |  |  |  |  |  |  |  |  | Non-evaluable evidence |
| **RESPIRATORY SYSTEM** |  |  |  |  |  |  |  |  |  |  |  |  |  |  |  |  |  |  |  |
| **Chronic Obstructive Pulmonary Disease** | Liao/2023 |  | Finngen | 16410 | 283589 | 31 | 0.320 | 0.220 | 0.480 |  | 0.380 | 0.220 | 0.660 |  | 0.350 | 0.050 | 2.290 |  | Robust evidence |
| **Asthma** | Liao/2023 |  | Finngen | 37253 | 187112 | 31 | 0.590 | 0.440 | 0.790 |  | 0.630 | 0.420 | 0.950 |  | 0.300 | 0.080 | 1.150 |  | Robust evidence |
|  | *De novo MR 2024* | ebi-a-GCST90014325 |  | 56167 | 352255 | 41 | 0.866 | 0.657 | 1.141 |  | 1.016 | 0.738 | 1.400 |  | 0.281 | 0.085 | 0.934 |  |  |
|  |  | **Meta-analysis** |  |  |  |  | 0.723 | 0.591 | 0.884 |  | 0.847 | 0.658 | 1.089 |  | 0.289 | 0.119 | 0.706 | 0.002 |  |
| **Emphysema** | Liao/2023 |  | Finngen | 1655 | 283589 | 36 | 0.150 | 0.050 | 0.420 |  | 0.120 | 0.030 | 0.540 |  | 0.050 | 0.000 | 6.99 |  | Robust evidence |
| **Bronchitis** | Liao/2023 |  | Finngen | 49078 | 293421 | 36 | 0.500 | 0.350 | 0.730 |  | 0.440 | 0.250 | 0.750 |  | 0.130 | 0.020 | 0.710 |  | Robust evidence |
| **Idiopathic Pulmonary Fibrosis** | Lai/2023 | finn-b-IPF | Finngen | 1028 | 196986 | 41 | 1.359 | 0.335 | 5.523 |  | 1.154 | 0.182 | 7.329 |  |  |  |  |  | Insufficient evidence |
| **Obstructive Sleep Apnea** | Lai/2023 | finn-b-G6_SLEEPAPNO | Finngen | 16761 | 201194 | 41 | 0.641 | 0.411 | 1.002 |  | 0.634 | 0.370 | 1.086 |  | 0.092 | 0.013 | 0.636 |  | Suggestive evidence |
| **DIGESTIVE SYSTEM** |  |  |  |  |  |  |  |  |  |  |  |  |  |  |  |  |  |  |  |
| **Gastroesophageal Reflux Disease** | Zou/2023 |  | Finngen | 22867 | 292256 | 43 | 0.685 | 0.467 | 1.004 |  | 0.549 | 0.352 | 0.856 |  | 0.284 | 0.051 | 1.567 |  | Robust evidence |
|  | Liu/2024b | ebi-a-GCST90000514 | European Bioinformatics Institute | 12908 | 473524 | 26 | 0.370 | 0.270 | 0.500 |  | 0.440 | 0.300 | 0.610 |  | 0.130 | 0.020 | 0.860 |  |  |
|  |  | **Meta-analysis** |  |  |  |  | 0.471 | 0.371 | 0.599 |  | 0.482 | 0.362 | 0.641 |  | 0.199 | 0.056 | 0.707 | <0.001 |  |
| **Barrett’s Esophagus** | Zou/2023 |  | Finngen | 946 | 292256 | 43 | 1.076 | 0.289 | 4.003 |  | 1.226 | 0.214 | 7.002 |  | 0.484 | 0.001 | 172.0 |  | Suggestive evidence |
|  | Junhai/2024 | <https://doi.org/10.1136/gutjnl-2020-323906> | Esophageal cancer consortium | 13358 | 43071 | 14 | 0.260 | 0.100 | 0.650 |  | 0.470 | 0.140 | 1.510 |  | 0.150 | 0.000 | 792.8 |  |  |
|  |  | **Meta-analysis** |  |  |  |  | 0.419 | 0.196 | 0.899 |  | 0.637 | 0.239 | 1.702 |  | 0.328 | 0.002 | 45.43 | 0.025 |  |
| **Esophageal Cancer** | Zou/2023 |  | Finngen | 503 | 259583 | 43 | 0.087 | 0.011 | 0.701 |  | 0.171 | 0.011 | 2.633 |  | 0.123 | 0.000 | 1581 |  | Suggestive evidence |
| **Colorectal Cancer** | Zhang/2024 | ebi-a-GCST012876 | European Bioinformatics Institute | 11895 | 14659 | 41 | 0.522 | 0.311 | 0.875 |  | 0.540 | 0.262 | 1.113 |  | 0.939 | 0.088 | 10.05 |  | Suggestive evidence |
|  | *De novo MR 2024* | finn-b-C3_COLORECTAL |  | 3022 | 215770 | 39 | 1.032 | 0.483 | 2.205 |  | 0.881 | 0.294 | 2.643 |  | 2.671 | 0.092 | 77.76 |  |  |
|  |  | **Meta-analysis** |  |  |  |  | 0.648 | 0.423 | 0.994 |  | 0.626 | 0.342 | 1.146 |  | 1.327 | 0.191 | 9.216 | 0.047 |  |
| **Cholelithiasis** | Xie/2024b | GCST90018819 | European Bioinformatics Institute | 26122 | 461431 | 32 | 0.570 | 0.410 | 0.800 |  | 0.595 | 0.391 | 0.907 |  | 0.258 | 0.047 | 1.423 |  | Robust evidence |
| **Chronic Pancreatitis** | Mao/2023 |  | Finngen | 2659 | 273442 | 42 | 0.361 | 0.167 | 0.776 |  | 0.263 | 0.089 | 0.777 |  | 0.051 | 0.002 | 1.609 |  | Robust evidence |
| **Acute Pancreatitis** | Mao/2023 |  | Finngen | 4648 | 273442 | 42 | 0.280 | 0.156 | 0.502 |  | 0.238 | 0.102 | 0.555 |  | 0.131 | 0.009 | 1.849 |  | Robust evidence |
| **Umbilical Hernia** | Yang/2024b | finn-b-K11_UMBHER | Finngen | 4224 | 190557 | 39 | 0.846 | 0.346 | 2.066 |  | 1.218 | 0.418 | 3.544 |  | 0.008 | 0.000 | 0.322 |  | Suggestive evidence |
| **Ventral Hernia** | Yang/2024b | finn-b-K11_VENTHER | Finngen | 3737 | 190557 | 39 | 0.322 | 0.141 | 0.735 |  | 0.239 | 0.079 | 0.717 |  | 0.425 | 0.010 | 17.42 |  | Robust evidence |
| **Inguinal Hernia** | Yang/2024b | finn-b-K11_HERING | Finngen | 17096 | 190557 | 39 | 1.160 | 0.726 | 1.853 |  | 1.019 | 0.560 | 1.853 |  | 2.429 | 0.301 | 19.61 |  | Insufficient evidence |
| **ENDOCRINE AND METABOLIC DISORDERS** |  |  |  |  |  |  |  |  |  |  |  |  |  |  |  |  |  |  |  |
| **Type 2 Diabetes** | Guan/2024 | ebi-a-GCST006867 | European Bioinformatics Institute | 61714 | 593952 | 36 | 0.392 | 0.241 | 0.636 |  | 0.468 | 0.306 | 0.717 |  | 0.481 | 0.048 | 4.852 |  | Robust evidence |
|  | *De novo MR 2024* | finn-b-E4_DM2 |  | 32469 | 183185 | 39 | 0.440 | 0.241 | 0.802 |  | 0.481 | 0.289 | 0.798 |  | 0.065 | 0.005 | 0.899 |  |  |
|  |  | **Meta-analysis** |  |  |  |  | 0.410 | 0.281 | 0.598 |  | 0.473 | 0.341 | 0.656 |  | 0.202 | 0.036 | 1.141 | <0.001 |  |
| **Gout** | Ou/2024 |  | Finngen | 8489 |  | 39 | 0.533 | 0.286 | 0.992 |  | 0.604 | 0.298 | 1.224 |  | 0.038 | 0.003 | 0.561 |  | Robust evidence |
| **CANCER / NEOPLASMS** |  |  |  |  |  |  |  |  |  |  |  |  |  |  |  |  |  |  |  |
| **Breast Cancer** | Wang/2023b | ieu-a-1126 | BCAC | 122977 | 105974 | 38 | 0.548 | 0.428 | 0.701 |  | 0.591 | 0.436 | 0.800 |  | 0.472 | 0.145 | 1.527 |  | Robust evidence |
| **Breast Cancer ER-** | Wang/2023b | ieu-1-1128 | BCAC | 21468 | 105974 | 39 | 0.480 | 0.339 | 0.678 |  | 0.501 | 0.305 | 0.822 |  | 0.581 | 0.116 | 2.893 |  | Robust evidence |
| **Breast Cancer ER+** | Wang/2023b | ieu-1-1127 | BCAC | 69501 | 105974 | 38 | 0.621 | 0.469 | 0.822 |  | 0.744 | 0.526 | 1.052 |  | 0.534 | 0.140 | 2.034 |  | Suggestive evidence |
| **Lung Cancer** | Yan/2023 | [GCST004748](https://www.ebi.ac.uk/gwas/studies/GCST004748) | European Bioinformatics Institute | 29266 |  | 33 | 0.266 | 0.179 | 0.394 |  | 0.276 | 0.142 | 0.533 |  | 0.307 | 0.007 | 14.45 |  | Robust evidence |
| **Lung Adenocarcinoma** | Yan/2023 | [GCST004744](https://www.ebi.ac.uk/gwas/studies/GCST004744) | European Bioinformatics Institute | 11273 |  | 32 | 0.494 | 0.285 | 0.858 |  | 0.494 | 0.213 | 1.149 |  | 2.215 | 0.051 | 96.68 |  | Suggestive evidence |
| **Squamus Cell Lung Cancer** | Yan/2023 | [GCST004750](https://www.ebi.ac.uk/gwas/studies/GCST004750) | European Bioinformatics Institute | 7426 |  | 32 | 0.120 | 0.063 | 0.228 |  | 0.134 | 0.050 | 0.364 |  | 0.023 | 0.000 | 10.16 |  | Robust evidence |
|  | Jin/2022 | ieu-a-967 |  | 3275 | 15038 | 39 | 0.230 | 0.088 | 0.599 |  | 0.179 | 0.055 | 0.585 |  |  |  |  |  |  |
|  | *De novo MR 2024* | finn-b-C3_NSCLC_SQUAM_EXALLC |  | 365 | 174004 | 39 | 0.069 | 0.008 | 0.577 |  | 0.057 | 0.003 | 1.211 |  | 0.008 | 0.000 | 96.31 |  |  |
|  |  | **Meta-analysis** |  |  |  |  | 0.141 | 0.084 | 0.236 |  | 0.143 | 0.068 | 0.299 |  |  |  |  | <0.001 |  |
| **Small Cell Lung Cancer** | Yan/2023 | [GCST004746](https://www.ebi.ac.uk/gwas/studies/GCST004746) | European Bioinformatics Institute | 2664 |  | 31 | 0.239 | 0.086 | 0.664 |  | 0.423 | 0.091 | 1.974 |  | 0.131 | 0.000 | 115.9 |  | Suggestive evidence |
| **Prostate Cancer** | Jin/2022 | ebi-a-GCST006085 |  | 79148 | 61106 | 41 | 1.142 | 0.750 | 1.741 |  | 1.337 | 0.938 | 1.905 |  |  |  |  |  | Insufficient evidence |
|  | Zhan/2023 | finn-bC3_PROSTATE | Finngen | 6311 |  | 12 | 1.380 | 0.670 | 2.850 |  |  |  |  |  |  |  |  |  |  |
|  |  | **Meta-analysis** |  |  |  |  | 1.198 | 0.833 | 1.724 |  |  |  |  |  |  |  |  | 0.33 |  |
| **Thyroid Cancer** | Jin/2022 | ieu-a-1082 |  | 649 | 431 | 7 | 0.185 | 0.000 | 195.8 |  | 1.337 | 0.938 | 1.905 |  |  |  |  |  | Insufficient evidence |
|  | *De novo MR 2024* | ebi-a-GCST90018929 |  | 1054 | 490920 | 41 | 0.393 | 0.129 | 1.200 |  | 0.249 | 0.050 | 1.239 |  | 0.173 | 0.001 | 30.31 |  |  |
|  |  | **Meta-analysis** |  |  |  |  | 0.386 | 0.128 | 1.164 |  | 1.237 | 0.875 | 1.747 |  |  |  |  | 0.091 |  |
| **Pancreatic Cancer** | Jin/2022 | ieu-a-822 |  | 1896 | 1939 | 8 | 0.027 | 0.001 | 0.678 |  | 0.013 | 0.000 | 0.997 |  |  |  |  |  | Suggestive evidence |
|  | *De novo MR 2024* | ebi-a-GCST90018893 |  | 1196 | 475049 | 41 | 0.625 | 0.226 | 1.732 |  | 0.488 | 0.115 | 2.065 |  | 0.649 | 0.006 | 71.36 |  |  |
|  |  | **Meta-analysis** |  |  |  |  | 0.470 | 0.178 | 1.241 |  | 0.335 | 0.085 | 1.315 |  |  |  |  | 0.127 |  |
| **Ovarian Cancer** | Jin/2022 | ieu-a-1120 |  | 25509 | 40941 | 40 | 0.603 | 0.396 | 0.918 |  | 0.758 | 0.436 | 1.315 |  |  |  |  |  | Suggestive evidence |
| **Endometrial Cancer** | Jin/2022 | ebi-a-GCST006464 |  | 12906 | 108979 | 41 | 0.959 | 0.568 | 1.618 |  | 0.153 | 0.000 | 700.0 |  |  |  |  |  | Insufficient evidence |
|  | Jin/2022 | ukb-b-13545 | Replication sample |  |  | 20 | 0.999 | 0.995 | 1.004 |  | 0.999 | 0.993 | 1.006 |  |  |  |  |  |  |
| **Cervical Cancer** | Jin/2022 | ieu-b-4876 |  | 563 | 198523 | 37 | 0.995 | 0.990 | 1.000 |  | 0.305 | 0.173 | 1.730 |  |  |  |  |  | Suggestive evidence |
| **Bladder Cancer** | Jin/2022 | ieu-b-4874 |  | 1279 | 372016 | 37 | 1.000 | 0.996 | 1.005 |  | 1.001 | 0.995 | 1.007 |  |  |  |  |  | Insufficient evidence |
| **Brain Cancer** | Jin/2022 | ieu-b-4875 |  | 606 | 372016 | 37 | 1.000 | 0.997 | 1.004 |  | 1.000 | 0.996 | 1.005 |  |  |  |  |  | Insufficient evidence |
| **Oral Cavity/Pharyngeal Cancer** | Jin/2022 | ieu-b-90 |  | 2342 | 2329 | 34 | 0.173 | 0.043 | 0.692 |  | 0.266 | 0.038 | 1.862 |  |  |  |  |  | Suggestive evidence |
|  | *De novo MR 2024* | finn-b-C3_LIP_ORAL_PHARYNX |  | 126 | 218666 | 39 | 0.169 | 0.004 | 8.038 |  | 0.117 | 0.001 | 19.20 |  | 0.015 | 0.000 | 502344 |  |  |
|  |  | **Meta-analysis** |  |  |  |  | 0.173 | 0.047 | 0.636 |  | 0.239 | 0.039 | 1.477 |  |  |  |  | 0.008 |  |
| **Cutaneous Melanoma** | Wang/2024 | Ieu-b-4969 | UK Biobank | 3751 | 372016 |  | 1.005 | 0.998 | 1.012 |  | 1.004 | 0.994 | 1.013 |  | 0.992 | 0.963 | 1.022 |  | Insufficient evidence |
| **Keratinocyte Skin Cancer** | Wang/2024 | Ieu-b-4959 | UK Biobank | 23694 | 372016 |  | 1.011 | 0.992 | 1.030 |  | 1.012 | 0.988 | 1.035 |  | 0.947 | 0.874 | 1.027 |  | Insufficient evidence |
| **UROLOGICAL AND REPRODUCTIVE SYSTEM** |  |  |  |  |  |  |  |  |  |  |  |  |  |  |  |  |  |  |  |
| **Calculus of Kidney and Ureter** | Lin/2023 | N14_CALCUKIDUR | Finngen | 8597 |  | 30 | 0.721 | 0.424 | 1.227 |  | 1.018 | 0.534 | 1.942 |  | 0.059 | 0.006 | 0.603 |  | Suggestive evidence |
| **Calculus of Lower Urinary Tract** | Lin/2023 | N14_CALCULOWER | Finngen | 1224 |  | 30 | 0.722 | 0.189 | 2.753 |  | 0.785 | 0.148 | 4.173 |  | 0.004 | 0.000 | 1.604 |  | Insufficient evidence |
|  | *De novo MR 2024* | ukb-e-594_CSA |  | 206 | 8639 | 40 | 4.749 | 0.244 | 92.51 |  | 6.726 | 0.118 | 382.0 |  | 16.61 | 0.000 | 21310310 |  |  |
|  |  | **Meta-analysis** |  |  |  |  | 0.993 | 0.293 | 3.366 |  | 1.074 | 0.230 | 5.024 |  | 0.039 | 0.000 | 6.300 | 0.991 |  |
| **Male Infertility** | Chen/2024 | finn- b-N14_MALEINFERT | Finngen | 680 | 72799 | 43 | 0.330 | 0.071 | 1.529 |  | 0.204 | 0.023 | 18.19 |  | 0.254 | 0.000 | 2444 |  | Insufficient evidence |
| **Female Infertility** | Chen/2024 | finn- b-N14_FEMALEINFERT | Finngen | 6481 | 68969 | 43 | 0.700 | 0.391 | 1.252 |  | 0.841 | 0.390 | 1.812 |  | 3.314 | 0.248 | 44.35 |  | Insufficient evidence |
| **IMMUNE MEDIATED DISEASES** |  |  |  |  |  |  |  |  |  |  |  |  |  |  |  |  |  |  |  |
| **AQP4‑positive Neuromyelitis Optica Spectrum Disorders** | Wang/2023 | GCST006937 | European Bioinformatics Institute | 132 | 784 | 41 | 24.12 | 0.120 | 4864 |  | 191.37 | 0.065 | 560408 |  | 0.163 | 0.000 | 3516300886 |  | Insufficient evidence |
| **Ulcerative Colitis** | Bu/2024 | finn-b-K11_ULCER | Finngen | 432 |  | 41 | 0.488 | 0.261 | 0.915 |  | 0.733 | 0.294 | 1.829 |  | 0.307 | 0.013 | 7.353 |  | Suggestive evidence |
| **INFECTIOUS DISEASES** |  |  |  |  |  |  |  |  |  |  |  |  |  |  |  |  |  |  |  |
| **COVID-19 (susceptibility)** | Li/2024c | https://www.covid19hg.org/results/r7/ |  | 122616 | 2475240 | 29 | 1.210 | 0.980 | 1.490 |  | 1.231 | 0.946 | 1.602 |  | 1.068 | 0.314 | 3.629 |  | Insufficient evidence |
| **COVID-19 (hospitalization)** | Li/2024c | https://www.covid19hg.org/results/r7/ |  | 32519 | 2062805 | 29 | 2.080 | 1.370 | 3.150 |  | 2.175 | 1.267 | 3.732 |  | 1.622 | 0.145 | 18.17 |  | Robust evidence |
| **COVID-19 (severity)** | Li/2024c | https://www.covid19hg.org/results/r7/ |  | 13769 | 1072442 | 29 | 1.980 | 1.160 | 3.370 |  | 1.633 | 0.768 | 3.474 |  | 5.678 | 0.260 | 123.9 |  | Suggestive evidence |
| **PERIODONTAL DISEASES** |  |  |  |  |  |  |  |  |  |  |  |  |  |  |  |  |  |  |  |
| **Acute Gingivitis** | Ying/2024 | finn-b-K11_GINGIVITIS_ACUTE | Finngen |  |  | 43 | 0.020 | 0.000 | 0.420 |  |  |  |  |  |  |  |  |  | Non-evaluable evidence |
| **Chronic Gingivitis** | Ying/2024 | finn-b-K11_GINGIVITIS_CHRONIC | Finngen |  |  | 43 | 0.730 | 0.180 | 2.940 |  |  |  |  |  |  |  |  |  | Non-evaluable evidence |
| **Acute Periodontitis** | Ying/2024 | finn-b-K11_PERIODON_ACUTE | Finngen |  |  | 43 | 0.410 | 0.030 | 5.930 |  |  |  |  |  |  |  |  |  | Non-evaluable evidence |
| **Chronic Periodontitis** | Ying/2024 | finn-b-K11_PERIODON_CHRON | Finngen |  |  | 43 | 0.630 | 0.300 | 1.330 |  |  |  |  |  |  |  |  |  | Non-evaluable evidence |

**Table S3. Mendelian randomization studies, meta-analysis results, and certainty of evidence ratings of fresh fruit intake as exposure**

| **Disease** | **Study** | **GWAS ID** | **Consortium** | **Cases** | **Noncases** | **SNPs** | **IVW** | | |  | **Weighted median** | | |  | **MR- Egger** | | | ***P*-value for meta-analysis** | **Evidence rating** |
| --- | --- | --- | --- | --- | --- | --- | --- | --- | --- | --- | --- | --- | --- | --- | --- | --- | --- | --- | --- |
| **MUSCULOSKELETAL SYSTEM** |  |  |  |  |  |  | **OR** | **LB** | **UB** |  | **OR** | **LB** | **UB** |  | **OR** | **LB** | **UB** |  |
| **Knee osteoarthritis** | Xie/2023 | <https://www.cell.com/cell/fulltext/S0092-8674(21)00941-7> | Genetics of Osteoarthritis |  |  | 137 | 1.152 | 0.910 | 1.459 |  | 1.154 | 0.875 | 1.523 |  | 1.087 | 0.464 | 2.543 |  | Insufficient evidence |
|  | Lv/2024 | ebi-a-GCST007090 | European Bioinformatics Institute | 24955 | 378169 | 43 | 0.920 | 0.610 | 1.380 |  | 0.820 | 0.470 | 1.430 |  | 0.730 | 0.180 | 3.010 |  |  |
|  |  | **Meta-analysis** |  |  |  |  | 1.089 | 0.888 | 1.336 |  | 1.079 | 0.842 | 1.382 |  | 0.977 | 0.472 | 2.024 | 0.414 |  |
| **Hip Osteoarthritis** | Xie/2023 | <https://www.cell.com/cell/fulltext/S0092-8674(21)00941-7> | Genetics of Osteoarthritis |  |  | 139 | 1.176 | 0.865 | 1.598 |  | 1.284 | 0.881 | 1.870 |  | 1.975 | 0.683 | 5.704 |  | Insufficient evidence |
| **Spinal Osteoarthritis** | Xie/2023 | <https://www.cell.com/cell/fulltext/S0092-8674(21)00941-7> | Genetics of Osteoarthritis |  |  | 141 | 0.808 | 0.603 | 1.082 |  | 0.907 | 0.602 | 1.366 |  | 1.788 | 0.635 | 5.030 |  | Insufficient evidence |
| **Hand Osteoarthritis** | Xie/2023 | <https://www.cell.com/cell/fulltext/S0092-8674(21)00941-7> | Genetics of Osteoarthritis |  |  | 139 | 0.987 | 0.705 | 1.383 |  | 0.864 | 0.533 | 1.399 |  | 0.933 | 0.291 | 2.995 |  | Insufficient evidence |
| **Adhesive Capsulitis of Shoulder** | Yang/2023 | finn-b-M13_ADHCAPSULITIS | Finngen | 2942 | 167641 | 52 | 1.095 | 0.448 | 2.679 |  | 1.183 | 0.310 | 4.508 |  | 4.130 | 0.197 | 86.61 |  | Insufficient evidence |
| **Chronic Knee Pain** | Zhou/2023 | ukb-b-8906 | UK Biobank | 7691 | 20979 | 39 | 1.000 | 0.925 | 1.082 |  | 1.000 | 0.889 | 1.125 |  |  |  |  |  | Insufficient evidence |
| **Chronic Hip Pain** | Zhou/2023 | ukb-b-133 | UK Biobank | 40152 | 11364 | 39 | 1.073 | 0.972 | 1.183 |  | 1.094 | 0.935 | 1.280 |  |  |  |  |  | Insufficient evidence |
| **Chronic Back Pain** | Zhou/2023 | ukb-b-8463 | UK Biobank | 80588 | 36816 | 39 | 0.961 | 0.888 | 1.039 |  | 0.951 | 0.846 | 1.070 |  |  |  |  |  | Insufficient evidence |
| **Chronic Neck/ShoulderPain** | Zhou/2023 | ukb-b-16118 | UK Biobank | 72887 | 32509 | 39 | 0.961 | 0.888 | 1.039 |  | 0.923 | 0.821 | 1.038 |  |  |  |  |  | Insufficient evidence |
| **Low Back Pain** | Huang/2023b | finn-b-M13-LOWBACKPAIN | Finngen | 13178 | 164682 | 51 | 0.594 | 0.358 | 0.987 |  |  |  |  |  |  |  |  |  | Non-evaluable evidence |
| **Multi-site Chronic Pain** | Zhou/2023 | 31194737 |  |  |  | 39 | 0.844 | 0.736 | 0.968 |  | 0.844 | 0.721 | 0.987 |  |  |  |  |  | Robust evidence |
| **NERVOUS SYSTEM** |  |  |  |  |  |  |  |  |  |  |  |  |  |  |  |  |  |  |  |
| **Migraine** | Liu/2023 |  | Finngen |  |  | 256 | 1.018 | 0.860 | 1.200 |  | 1.060 | 0.830 | 1.350 |  | 0.720 | 0.400 | 1.320 |  | Insufficient evidence |
| **Migraine with Aura** | Liu/2023 |  | Finngen |  |  | 256 | 1.064 | 0.820 | 1.380 |  | 0.880 | 0.610 | 1.260 |  | 1.600 | 0.640 | 3.960 |  | Insufficient evidence |
| **Migraine without Aura** | Liu/2023 |  | Finngen |  |  | 256 | 1.110 | 0.860 | 1.430 |  | 0.920 | 0.630 | 1.360 |  | 0.520 | 0.210 | 1.270 |  | Insufficient evidence |
| **Chronic Headache** | Zhou/2023 | ukb-b-13092 | UK Biobank | 41719 | 4955 | 39 | 0.980 | 0.871 | 1.103 |  | 0.961 | 0.838 | 1.102 |  |  |  |  |  | Insufficient evidence |
| **Amyotrophic Lateral Sclerosis** | Jing/2024 | ebi-a-GCST90027164 | European Bioinformatics Institute | 27205 | 110881 | 50 | 0.595 | 0.373 | 0.947 |  | 0.906 | 0.510 | 1.609 |  | 0.374 | 0.067 | 2.095 |  | Suggestive evidence |
| **Parkinson’s Disease** | Zeng/2024 | ieu-b-7 | International Parkinson's Disease Genomics Consortium |  |  | 52 | 1.025 | 0.526 | 1.997 |  | 0.674 | 0.255 | 1.781 |  | 1.460 | 0.145 | 14.64 |  | Insufficient evidence |
|  | *De novo MR 2024* | finn-b-G6_PARKINSON |  | 2162 | 216630 | 50 | 0.760 | 0.201 | 2.878 |  | 0.840 | 0.157 | 4.507 |  | 0.095 | 0.001 | 8.816 |  |  |
|  |  | **Meta-analysis** |  |  |  |  | 0.965 | 0.532 | 1.753 |  | 0.712 | 0.307 | 1.652 |  | 0.834 | 0.107 | 6.526 | 0.908 |  |
| **Alzheimer** | Liao/2024 | Finngen_R8_G6_ALZHEIMER | Finngen | 7759 | 33474 | 38 | 0.970 | 0.500 | 1.910 |  | 0.740 | 0.260 | 2.060 |  | 0.260 | 0.030 | 2.580 |  | Insufficient evidence |
| **Autism Spectrum Disorder** | Li/2024b | ieu-a-1185 | iPSYCH-PGC | 18382 | 27969 | 43 | 1.792 | 0.850 | 3.780 |  | 2.555 | 1.100 | 5.932 |  | 1.025 | 0.066 | 15.84 |  | Suggestive evidence |
|  | *De novo MR 2024* | finn-b-F5_AUTISM |  | 293 | 216829 | 50 | 2.642 | 0.132 | 52.90 |  | 2.110 | 0.029 | 154.3 |  | 21.31 | 0.001 | 601782 |  |  |
|  |  | **Meta-analysis** |  |  |  |  | 1.833 | 0.889 | 3.781 |  | 2.537 | 1.110 | 5.799 |  | 1.256 | 0.089 | 17.73 | 0.101 |  |
| **Bipolar Disorder** | Li/2024 | ieu-b-5110 | PGC Bipolar Disorder Working Group of the Psychiatric Genomics Consortium | 41917 | 371549 | 18 | 1.293 | 1.293 | 2.822 |  | 1.077 | 0.492 | 2.360 |  | 2.061 | 0.222 | 19.10 |  | Insufficient evidence |
|  | *De novo MR 2024* | finn-b-F5_BIPO |  | 4501 | 192220 | 50 | 0.731 | 0.262 | 2.044 |  | 0.948 | 0.263 | 3.424 |  | 2.224 | 0.067 | 74.41 |  |  |
|  |  | **Meta-analysis** |  |  |  |  | 1.050 | 0.564 | 1.955 |  | 1.041 | 0.533 | 2.032 |  | 2.106 | 0.321 | 13.81 | 0.879 |  |
| **Depression** | Yan/2023b | <https://www.nature.com/articles/s41467-018-03819-3> | UK Biobank | 113769 | 208811 | 39 | 0.920 | 0.870 | 0.960 |  |  |  |  |  |  |  |  |  | Suggestive evidence |
|  | *De novo MR 2024* | finn-b-F5_DEPRESSIO |  | 23424 | 192220 | 50 | 0.846 | 0.529 | 1.352 |  | 0.990 | 0.563 | 1.739 |  | 5.360 | 1.184 | 24.27 |  |  |
|  |  | **Meta-analysis** |  |  |  |  | 0.919 | 0.871 | 0.970 |  |  |  |  |  |  |  |  | 0.002 |  |
| **Major Depressive Disorder** | Liu/2023 |  | UK Biobank | 246363 | 561190 | 256 | 0.904 | 0.840 | 0.970 |  | 0.900 | 0.830 | 0.990 |  | 0.990 | 0.770 | 1.280 |  | Robust evidence |
| **Anxiety** | Liu/2023 |  | Integrative Psychiatric Research (iPSYCH) | 4584 | 19225 | 257 | 0.872 | 0.650 | 1.160 |  | 1.300 | 0.870 | 1.950 |  | 1.860 | 0.660 | 5.190 |  | Insufficient evidence |
| **Insomnia** | Liu/2023 |  | UK Biobank | 397959 | 933051 | 238 | 0.838 | 0.780 | 0.900 |  | 0.870 | 0.790 | 0.950 |  | 0.850 | 0.660 | 1.100 |  | Robust evidence |
| **CARDIOVASCULAR SYSTEM** |  |  |  |  |  |  |  |  |  |  |  |  |  |  |  |  |  |  |  |
| **Hypertension** | Li/2024 | finn-b-I9_HYPTENS | Finngen | 55917 | 162837 | 52 | 0.972 | 0.630 | 1.497 |  | 1.147 | 0.694 | 1.896 |  | 3.075 | 0.723 | 13.08 |  | Insufficient evidence |
|  | *De novo MR 2024* | ebi-a-GCST90038604 |  | 129909 | 354689 | 51 | 1.016 | 0.952 | 1.085 |  | 1.030 | 0.975 | 1.088 |  | 1.052 | 0.835 | 1.325 |  |  |
|  |  | **Meta-analysis** |  |  |  |  | 1.015 | 0.952 | 1.083 |  | 1.031 | 0.977 | 1.088 |  | 1.080 | 0.860 | 1.357 | 0.646 |  |
| **RESPIRATORY SYSTEM** |  |  |  |  |  |  |  |  |  |  |  |  |  |  |  |  |  |  |  |
| **Chronic Obstructive Pulmonary Disease** | Liao/2023 |  | Finngen | 16410 | 283589 | 43 | 0.650 | 0.400 | 1.060 |  | 0.640 | 0.340 | 1.260 |  | 3.330 | 0.740 | 15.06 |  | Insufficient evidence |
| **Asthma** | Liao/2023 |  | Finngen | 37253 | 187112 | 45 | 0.570 | 0.400 | 0.810 |  | 0.630 | 0.390 | 1.000 |  | 1.350 | 0.420 | 4.340 |  | Insufficient evidence |
|  | *De novo MR 2024* | ebi-a-GCST90014325 |  | 56167 | 352255 | 51 | 1.077 | 0.771 | 1.503 |  | 0.916 | 0.646 | 1.299 |  | 1.162 | 0.359 | 3.754 |  |  |
|  |  | **Meta-analysis** |  |  |  |  | 0.798 | 0.626 | 1.016 |  | 0.802 | 0.606 | 1.062 |  | 1.253 | 0.548 | 2.866 | 0.067 |  |
| **Emphysema** | Liao/2023 |  | Finngen | 1655 | 283589 | 52 | 0.380 | 0.120 | 1.220 |  | 0.390 | 0.080 | 2.010 |  | 0.670 | 0.010 | 35.98 |  | Insufficient evidence |
| **Bronchitis** | Liao/2023 |  | Finngen | 49078 | 293421 | 52 | 0.770 | 0.500 | 1.190 |  | 0.770 | 0.500 | 1.190 |  | 0.350 | 0.080 | 1.540 |  | Insufficient evidence |
| **Idiopathic Pulmonary Fibrosis** | Lai/2023 | finn-b-IPF | Finngen | 1028 | 196986 | 53 | 1.773 | 0.394 | 7.796 |  | 6.231 | 0.664 | 60.230 |  | 3.065 | 0.017 | 524.1 |  | Insufficient evidence |
| **Obstructive Sleep Apnea** | Lai/2023 | finn-b-G6_SLEEPAPNO | Finngen | 16761 | 201194 | 53 | 1.136 | 0.610 | 2.113 |  | 1.183 | 0.606 | 2.309 |  | 1.735 | 0.204 | 14.72 |  | Insufficient evidence |
| **DIGESTIVE SYSTEM** |  |  |  |  |  |  |  |  |  |  |  |  |  |  |  |  |  |  |  |
| **Gastroesophageal Reflux Disease** | Zou/2023 |  | Finngen | 22867 | 292256 | 55 | 0.738 | 0.530 | 1.027 |  | 0.822 | 0.501 | 1.348 |  | 1.070 | 0.342 | 3.350 |  | Suggestive evidence |
|  | Liu/2024b | ebi-a-GCST90000514 | European Bioinformatics Institute | 12908 | 473524 | 37 | 0.790 | 0.560 | 1.110 |  | 0.870 | 0.600 | 1.270 |  | 1.650 | 0.460 | 5.880 |  |  |
|  |  | **Meta-analysis** |  |  |  |  | 0.763 | 0.601 | 0.967 |  | 0.852 | 0.632 | 1.149 |  | 1.297 | 0.555 | 3.035 | 0.026 |  |
| **Barrett’s Esophagus** | Zou/2023 |  | Finngen | 946 | 292256 | 55 | 0.506 | 0.093 | 2.756 |  | 0.593 | 0.050 | 7.053 |  | 2.041 | 0.006 | 709.7 |  | Robust evidence |
|  | Junhai/2024 | <https://doi.org/10.1136/gutjnl-2020-323906> | Esophageal cancer consortium | 13358 | 43071 | 22 | 0.280 | 0.110 | 0.710 |  | 0.230 | 0.070 | 0.760 |  | 0.190 | 0.008 | 4.610 |  |  |
|  |  | **Meta-analysis** |  |  |  |  | 0.321 | 0.142 | 0.727 |  | 0.275 | 0.094 | 0.805 |  | 0.329 | 0.020 | 5.437 | 0.006 |  |
| **Esophageal Cancer** | Zou/2023 |  | Finngen | 503 | 259583 | 55 | 0.127 | 0.016 | 1.021 |  | 0.065 | 0.003 | 1.539 |  | 0.193 | 0.000 | 247.0 |  | Insufficient evidence |
| **Colorectal Cancer** | Zhang/2024 | ebi-a-GCST012876 | European Bioinformatics Institute | 11895 | 14659 | 51 | 0.513 | 0.273 | 0.964 |  | 0.474 | 0.182 | 1.236 |  | 0.539 | 0.054 | 5.399 |  | Suggestive evidence |
|  | Yang/2024 |  | Finngen | 3022 | 174006 | 13 | 0.159 | 0.033 | 0.759 |  | 0.310 | 0.033 | 2.925 |  | 11.18 | 0.090 | 1386 |  |  |
|  |  | **Meta-analysis** |  |  |  |  | 0.436 | 0.243 | 0.782 |  | 0.444 | 0.184 | 1.071 |  | 0.947 | 0.119 | 7.560 | 0.005 |  |
| **Cholelithiasis** | Xie/2024b | GCST90018819 | European Bioinformatics Institute | 26122 | 461431 | 41 | 0.730 | 0.520 | 1.010 |  | 0.703 | 0.429 | 1.156 |  | 0.461 | 0.138 | 1.546 |  | Insufficient evidence |
| **Chronic Pancreatitis** | Mao/2023 |  | Finngen | 2659 | 273442 | 56 | 0.465 | 0.168 | 1.287 |  | 1.040 | 0.284 | 3.805 |  | 9.551 | 0.293 | 311.7 |  | Insufficient evidence |
| **Acute Pancreatitis** | Mao/2023 |  | Finngen | 4648 | 273442 | 56 | 0.448 | 0.213 | 0.943 |  | 0.510 | 0.179 | 1.456 |  | 13.05 | 1.136 | 149.9 |  | Suggestive evidence |
| **Umbilical Hernia** | Yang/2024b | finn-b-K11_UMBHER | Finngen | 4224 | 190557 | 52 | 0.795 | 0.361 | 1.751 |  | 0.490 | 0.144 | 1.662 |  | 0.042 | 0.003 | 0.559 |  | Suggestive evidence |
| **Ventral Hernia** | Yang/2024b | finn-b-K11_VENTHER | Finngen | 3737 | 190557 | 52 | 0.679 | 0.304 | 1.517 |  | 0.959 | 0.291 | 3.160 |  | 1.733 | 0.113 | 26.59 |  | Insufficient evidence |
| **Inguinal Hernia** | Yang/2024b | finn-b-K11_HERING | Finngen | 17096 | 190557 | 52 | 0.658 | 0.422 | 1.028 |  | 0.827 | 0.427 | 1.604 |  | 0.262 | 0.058 | 1.180 |  | Insufficient evidence |
| **ENDOCRINE AND METABOLIC DISORDERS** |  |  |  |  |  |  |  |  |  |  |  |  |  |  |  |  |  |  |  |
| **Type 2 Diabetes** | Muaddi/2024 |  | UK Biobank | 16183 |  | 41 | 0.920 | 0.900 | 0.940 |  |  |  |  |  |  |  |  |  | Non-evaluable evidence |
|  | Muaddi/2024 |  | Finngen | 32469 |  | 41 | 0.290 | 0.150 | 0.530 |  |  |  |  |  |  |  |  |  |  |
|  |  | **Meta-analysis** |  |  |  |  | 0.919 | 0.899 | 0.939 |  |  |  |  |  |  |  |  | <0.001 |  |
| **Gout** | Ou/2024 |  | Finngen | 8489 |  | 51 | 1.009 | 0.466 | 2.182 |  | 0.803 | 0.333 | 1.939 |  | 2.545 | 0.179 | 36.09 |  | Insufficient evidence |
| **CANCER / NEOPLASMS** |  |  |  |  |  |  |  |  |  |  |  |  |  |  |  |  |  |  |  |
| **Breast Cancer** | Wang/2023b | ieu-a-1126 | BCAC | 122977 | 105974 | 48 | 0.765 | 0.581 | 1.008 |  | 0.733 | 0.520 | 1.031 |  | 0.636 | 0.246 | 1.645 |  | Insufficient evidence |
| **Breast Cancer ER-** | Wang/2023b | ieu-1-1127 | BCAC | 69501 | 105974 | 51 | 0.803 | 0.593 | 1.089 |  | 0.677 | 0.454 | 1.010 |  | 0.345 | 0.124 | 0.958 |  | Suggestive evidence |
| **Breast Cancer ER+** | Wang/2023b | ieu-1-1128 | BCAC | 21468 | 105974 | 47 | 0.651 | 0.424 | 1.000 |  | 0.491 | 0.266 | 0.907 |  | 0.459 | 0.107 | 1.959 |  | Suggestive evidence |
| **Lung Cancer** | Yan/2023 | [GCST004748](https://www.ebi.ac.uk/gwas/studies/GCST004748) | European Bioinformatics Institute | 29266 | #REF! | 36 | 0.631 | 0.388 | 1.025 |  | 0.552 | 0.265 | 1.152 |  | 3.167 | 0.300 | 33.40 |  | Insufficient evidence |
| **Lung Adenocarcinoma** | Jin/2022 | ieu-a-965 |  | 3442 | 14894 | 50 | 1.316 | 0.496 | 3.490 |  | 1.633 | 0.392 | 6.800 |  |  |  |  |  | Insufficient evidence |
|  | Yan/2023 | [GCST004744](https://www.ebi.ac.uk/gwas/studies/GCST004744) | European Bioinformatics Institute | 11273 | #REF! | 36 | 0.626 | 0.320 | 1.223 |  | 0.694 | 0.257 | 1.874 |  | 2.444 | 0.181 | 32.93 |  |  |
|  |  | **Meta-analysis** |  |  |  |  | 0.795 | 0.457 | 1.381 |  | 0.918 | 0.406 | 2.074 |  |  |  |  | 0.415 |  |
| **Squamus Cell Lung Cancer** | Yan/2023 | [GCST004750](https://www.ebi.ac.uk/gwas/studies/GCST004750) | European Bioinformatics Institute | 7426 | #REF! | 34 | 0.494 | 0.222 | 1.098 |  | 0.813 | 0.247 | 2.679 |  | 2.609 | 0.102 | 66.53 |  | Suggestive evidence |
|  | Jin/2022 | ieu-a-967 |  | 3275 | 15038 | 50 | 0.488 | 0.156 | 1.522 |  | 0.965 | 0.239 | 3.894 |  |  |  |  |  |  |
|  |  | **Meta-analysis** |  |  |  |  | 0.492 | 0.256 | 0.946 |  | 0.874 | 0.353 | 2.163 |  |  |  |  | 0.034 |  |
| **Small Cell Lung Cancer** | Yan/2023 | [GCST004746](https://www.ebi.ac.uk/gwas/studies/GCST004746) | European Bioinformatics Institute | 2664 | #REF! | 34 | 0.884 | 0.252 | 3.106 |  | 2.045 | 0.316 | 13.241 |  | 15.48 | 0.085 | 2805 |  | Insufficient evidence |
| **Prostate Cancer** | Jin/2022 | ebi-a-GCST006085 |  | 79148 | 61106 | 53 | 1.298 | 0.889 | 1.896 |  | 1.379 | 0.904 | 2.104 |  |  |  |  |  | Suggestive evidence |
|  | Zhan/2023 | finn-bC3_PROSTATE | Finngen | 6311 | #REF! | 10 | 2.320 | 0.970 | 5.520 |  |  |  |  |  |  |  |  |  |  |
|  |  | **Meta-analysis** |  |  |  |  | 1.424 | 1.006 | 2.015 |  |  |  |  |  |  |  |  | 0.046 |  |
| **Thyroid Cancer** | Jin/2022 | ieu-a-1082 |  | 649 | 431 | 9 | 3.991 | 0.001 | 340.64 |  |  |  |  |  |  |  |  |  | Insufficient evidence |
|  | *De novo MR 2024* | ebi-a-GCST90018929 |  | 1054 | 490920 | 51 | 2.983 | 0.808 | 11.02 |  | 1.931 | 0.237 | 15.756 |  | 0.459 | 0.005 | 46.95 |  |  |
|  |  | **Meta-analysis** |  |  |  |  | 3.003 | 0.825 | 10.93 |  |  |  |  |  |  |  |  | 0.095 |  |
| **Pancreatic Cancer** | Jin/2022 | ieu-a-822 |  | 1896 | 1939 | 6 | 0.016 | 0.000 | 1.481 |  | 0.039 | 0.000 | 8.387 |  |  |  |  |  | Insufficient evidence |
|  | *De novo MR 2024* | ebi-a-GCST90018893 |  | 1196 | 475049 | 51 | 1.008 | 0.303 | 3.350 |  | 0.675 | 0.124 | 3.663 |  | 3.034 | 0.041 | 223.7 |  |  |
|  |  | **Meta-analysis** |  |  |  |  | 0.761 | 0.239 | 2.427 |  | 0.519 | 0.104 | 2.601 |  |  |  |  | 0.645 |  |
| **Ovarian Cancer** | Jin/2022 | ieu-a-1120 |  | 25509 | 40941 | 53 | 0.621 | 0.353 | 1.090 |  | 0.649 | 0.322 | 1.309 |  |  |  |  |  | Insufficient evidence |
| **Endometrial Cancer** | Jin/2022 | ebi-a-GCST006464 |  | 12906 | 108979 | 53 | 1.164 | 0.661 | 2.050 |  | 1.019 | 0.459 | 2.266 |  |  |  |  |  | Insufficient evidence |
| **Cervical Cancer** | Jin/2022 | ieu-b-4876 |  | 563 | 198523 | 46 | 0.998 | 0.992 | 1.004 |  | 0.976 | 0.989 | 1.006 |  |  |  |  |  | Insufficient evidence |
| **Bladder Cancer** | Jin/2022 | ieu-b-4874 |  | 1279 | 372016 | 47 | 0.998 | 0.993 | 1.003 |  | 0.999 | 0.992 | 1.007 |  |  |  |  |  | Insufficient evidence |
| **Brain Cancer** | Jin/2022 | ieu-b-4875 |  | 606 | 372016 | 46 | 0.997 | 0.992 | 1.002 |  | 0.996 | 0.992 | 1.000 |  |  |  |  |  | Insufficient evidence |
| **Oral Cavity/Pharyngeal Cancer** | Jin/2022 | ieu-b-90 |  | 2342 | 2329 | 29 | 3.493 | 0.982 | 12.43 |  | 1.639 | 0.644 | 4.176 |  |  |  |  |  | Insufficient evidence |
|  | *De novo MR 2024* | finn-b-C3_LIP_ORAL_PHARYNX |  | 126 | 218666 | 50 | 0.425 | 0.005 | 38.31 |  | 1.167 | 0.001 | 957.0 |  | 187.7 | 0.000 | 846007232 |  |  |
|  |  | **Meta-analysis** |  |  |  |  | 2.992 | 0.882 | 10.15 |  | 1.629 | 0.645 | 4.112 |  |  |  |  | 0.079 |  |
| **Cutaneous Melanoma** | Wang/2024 | Ieu-b-4969 | UK Biobank | 3751 | 372016 |  | 1.004 | 0.996 | 1.012 |  | 1.001 | 0.989 | 1.013 |  | 0.955 | 0.955 | 1.007 |  | Insufficient evidence |
| **Keratinocyte Skin Cancer** | Wang/2024 | Ieu-b-4959 | UK Biobank | 23694 | 372016 |  | 1.001 | 0.977 | 1.026 |  | 0.999 | 0.970 | 1.028 |  | 0.937 | 0.865 | 1.016 |  | Insufficient evidence |
| **UROLOGICAL AND REPRODUCTIVE SYSTEM** | #N/A |  |  |  |  |  |  |  |  |  |  |  |  |  |  |  |  |  |  |
| **Calculus of Kidney and Ureter** | Lin/2023 | N14_CALCUKIDUR | Finngen | 8597 | #REF! | 38 | 0.358 | 0.185 | 0.694 |  | 0.295 | 0.134 | 0.650 |  | 0.104 | 0.010 | 1.073 |  | Robust evidence |
| **Calculus of Lower Urinary Tract** | Lin/2023 | N14_CALCULOWER | Finngen | 1224 | #REF! | 38 | 0.247 | 0.069 | 0.889 |  | 0.126 | 0.019 | 0.857 |  | 0.006 | 0.000 | 0.594 |  | Robust evidence |
|  | *De novo MR 2024* | ukb-e-594_CSA |  | 206 | 8639 | 49 | 0.091 | 0.003 | 3.341 |  | 0.226 | 0.001 | 36.56 |  | 33.48 | 0.000 | 46368928 |  |  |
|  |  | **Meta-analysis** |  |  |  |  | 0.221 | 0.066 | 0.736 |  | 0.135 | 0.023 | 0.805 |  |  |  |  | 0.014 |  |
| **Urolithiasis** | Pan/2024 | N14_UROLITHIASIS | Finngen | 806 | 301094 | 55 | 0.464 | 0.219 | 0.983 |  | 0.466 | 0.172 | 1.264 |  | 0.063 | 0.005 | 0.776 |  | Robust evidence |
| **Male Infertility** | Chen/2024 | finn- b-N14_MALEINFERT | Finngen | 680 | 72799 | 55 | 1.785 | 0.282 | 11.28 |  | 2.135 | 0.142 | 32.093 |  | 1.762 | 0.003 | 1031 |  | Insufficient evidence |
| **Female Infertility** | Chen/2024 | finn- b-N14_FEMALEINFERT | Finngen | 6481 | 68969 | 55 | 0.953 | 0.484 | 1.874 |  | 0.728 | 0.287 | 1.845 |  | 0.646 | 0.063 | 6.656 |  | Insufficient evidence |
| **IMMUNE MEDIATED DISEASES** |  |  |  |  |  |  |  |  |  |  |  |  |  |  |  |  |  |  |  |
| **AQP4‑positive Neuromyelitis Optica Spectrum Disorders** | Wang/2023 | GCST006937 | European Bioinformatics Institute | 132 | 784 | 47 | 0.012 | 0.000 | 16.67 |  | 0.145 | 0.000 | 12758 |  | 151796840 | 0.000 | 64425500000000000000 |  | Insufficient evidence |
| **Ulcerative Colitis** | Bu/2024 | finn-b-K11_ULCER | Finngen | 432 |  | 53 | 0.977 | 0.465 | 2.054 |  | 0.765 | 0.250 | 2.345 |  | 0.190 | 0.015 | 2.406 |  | Insufficient evidence |
| **INFECTIOUS DISEASES** |  |  |  |  |  |  |  |  |  |  |  |  |  |  |  |  |  |  |  |
| **Syphilis** | Xie/2024 |  | Finngen | 350 | 212952 |  | 1.960 | 0.160 | 23.62 |  |  |  |  |  |  |  |  |  | Non-evaluable evidence |
| **COVID-19 (susceptibility)** | Li/2024c | https://www.covid19hg.org/results/r7/ |  | 122616 | 2475240 | 32 | 1.180 | 0.940 | 1.480 |  | 1.190 | 0.866 | 1.635 |  | 1.335 | 0.570 | 3.124 |  | Insufficient evidence |
| **COVID-19 (hospitalization)** | Li/2024c | https://www.covid19hg.org/results/r7/ |  | 32519 | 2062805 | 32 | 1.510 | 0.850 | 2.690 |  | 1.308 | 0.643 | 2.659 |  | 2.114 | 0.223 | 20.02 |  | Insufficient evidence |
| **COVID-19 (severity)** | Li/2024c | https://www.covid19hg.org/results/r7/ |  | 13769 | 1072442 | 32 | 1.380 | 0.580 | 3.260 |  | 0.868 | 0.304 | 2.475 |  | 8.941 | 0.230 | 347.2 |  | Insufficient evidence |
| **PERIODONTAL DISEASES** |  |  |  |  |  |  |  |  |  |  |  |  |  |  |  |  |  |  |  |
| **Acute Gingivitis** | Ying/2024 | finn-b-K11_GINGIVITIS_ACUTE | Finngen |  |  | 55 | 0.530 | 0.010 | 25.07 |  |  |  |  |  |  |  |  |  | Non-evaluable evidence |
| **Chronic Gingivitis** | Ying/2024 | finn-b-K11_GINGIVITIS_CHRONIC | Finngen |  |  | 55 | 0.180 | 0.040 | 0.910 |  |  |  |  |  |  |  |  |  | Non-evaluable evidence |
| **Acute Periodontitis** | Ying/2024 | finn-b-K11_PERIODON_ACUTE | Finngen |  |  | 55 | 12.95 | 1.090 | 153.3 |  |  |  |  |  |  |  |  |  | Non-evaluable evidence |
| **Chronic Periodontitis** | Ying/2024 | finn-b-K11_PERIODON_CHRON | Finngen |  |  | 55 | 1.600 | 0.670 | 3.810 |  |  |  |  |  |  |  |  |  | Non-evaluable evidence |

**Table S4. Mendelian randomization studies, meta-analysis results, and certainty of evidence ratings of cooked vegetable intake as exposure**

| **Disease** | **Study** | **GWAS ID** | **Consortium** | **Cases** | **Noncases** | **SNPs** | **IVW** | | |  | **Weighted median** | | |  | **MR- Egger** | | | ***P*-value for meta-analysis** | **Evidence rating** |
| --- | --- | --- | --- | --- | --- | --- | --- | --- | --- | --- | --- | --- | --- | --- | --- | --- | --- | --- | --- |
| **MUSCULOSKELETAL SYSTEM** |  |  |  |  |  |  | **OR** | **LB** | **UB** |  | **OR** | **LB** | **UB** |  | **OR** | **LB** | **UB** |  |
| Knee Osteoarthritis | Xie/2023 | <https://www.cell.com/cell/fulltext/S0092-8674(21)00941-7> | Genetics of Osteoarthritis |  |  | 93 | 1.248 | 1.014 | 1.535 |  | 1.193 | 0.901 | 1.580 |  | 1.268 | 0.611 | 2.635 |  | Suggestive evidence |
|  | Lv/2024 | ebi-a-GCST007090 | European Bioinformatics Institute | 24955 | 378169 | 11 | 1.500 | 0.840 | 2.680 |  | 1.360 | 0.610 | 3.040 |  | 4.540 | 0.010 | 1818 |  |  |
|  |  | **Meta-analysis** |  |  |  |  | 1.274 | 1.048 | 1.549 |  | 1.210 | 0.928 | 1.578 |  | 1.292 | 0.625 | 2.669 | 0.015 |  |
| Hip Osteoarthritis | Xie/2023 | <https://www.cell.com/cell/fulltext/S0092-8674(21)00941-7> | Genetics of Osteoarthritis |  |  | 92 | 1.431 | 1.134 | 1.805 |  | 1.451 | 1.026 | 2.053 |  | 1.478 | 0.610 | 3.584 |  | Robust evidence |
| Spinal Osteoarthritis | Xie/2023 | <https://www.cell.com/cell/fulltext/S0092-8674(21)00941-7> | Genetics of Osteoarthritis |  |  | 94 | 1.320 | 1.021 | 1.707 |  | 1.257 | 0.861 | 1.835 |  | 2.530 | 0.274 | 6.710 |  | Suggestive evidence |
| Hand Osteoarthritis | Xie/2023 | <https://www.cell.com/cell/fulltext/S0092-8674(21)00941-7> | Genetics of Osteoarthritis |  |  | 95 | 1.553 | 1.138 | 2.120 |  | 1.421 | 0.917 | 2.202 |  | 0.829 |  | 2.509 |  | Suggestive evidence |
| Chronic Knee Pain | Zhou/2023 | ukb-b-8906 | UK Biobank | 7691 | 20979 | 11 | 1.083 | 0.963 | 1.219 |  | 1.051 | 0.899 | 1.230 |  |  |  |  |  | Insufficient evidence |
| Chronic Hip Pain | Zhou/2023 | ukb-b-133 | UK Biobank | 40152 | 11364 | 11 | 1.139 | 0.974 | 1.332 |  | 1.105 | 0.891 | 1.371 |  |  |  |  |  | Insufficient evidence |
| Chronic Back Pain | Zhou/2023 | ukb-b-8463 | UK Biobank | 80588 | 36816 | 11 | 1.062 | 0.944 | 1.194 |  | 1.041 | 0.890 | 1.218 |  |  |  |  |  | Insufficient evidence |
| Chronic Neck/ShoulderPain | Zhou/2023 | ukb-b-16118 | UK Biobank | 72887 | 32509 | 11 | 1.062 | 0.944 | 1.194 |  | 1.031 | 0.864 | 1.229 |  |  |  |  |  | Insufficient evidence |
| Low Back Pain | Liu/2024 | finn-b-M13_LOWBACKPAIN | Finngen | 13178 | 164682 | 17 | 1.820 | 0.900 | 3.680 |  | 2.210 | 0.860 | 5.700 |  | 402.7 | 0.220 | 733602 |  | Insufficient evidence |
| Multi-site Chronic Pain | Zhou/2023 | 31194737 |  |  |  | 11 | 1.116 | 0.900 | 1.385 |  | 0.990 | 0.798 | 1.228 |  |  |  |  |  | Insufficient evidence |
| Osteoporosis | Xu/2022 | <https://www.tandfonline.com/doi/full/10.2217/14622416.6.6.639> | UK Biobank | 9434 | 444941 |  | 0.978 | 0.977 | 0.979 |  |  |  |  |  |  |  |  |  | Suggestive evidence |
|  | *De novo MR 2024* | finn-b-M13_OSTEOPOROSIS |  | 3203 | 209575 | 17 | 0.359 | 0.080 | 1.614 |  | 0.355 | 0.040 | 3.153 |  | 0.285 | 0.000 | 298.27 |  |  |
| **NERVOUS SYSTEM** |  |  |  |  |  |  |  |  |  |  |  |  |  |  |  |  |  |  |  |
| Migraine | Liu/2023 |  | Finngen |  |  | 132 | 0.968 | 0.740 | 1.260 |  | 0.890 | 0.620 | 1.270 |  | 1.090 | 0.380 | 3.110 |  | Insufficient evidence |
| Migraine with Aura | Liu/2023 |  | Finngen |  |  | 132 | 0.992 | 0.660 | 1.500 |  | 1.370 | 0.800 | 2.370 |  | 3.470 | 0.680 | 17.58 |  | Insufficient evidence |
| Migraine without Aura | Liu/2023 |  | Finngen |  |  | 132 | 0.601 | 0.410 | 0.880 |  | 0.580 | 0.330 | 1.010 |  | 0.270 | 0.060 | 1.220 |  | Suggestive evidence |
| Chronic Headache | Zhou/2023 | ukb-b-13092 | UK Biobank | 41719 | 4955 | 11 | 1.010 | 0.881 | 1.159 |  | 0.942 | 0.759 | 1.168 |  |  |  |  |  | Insufficient evidence |
| Amyotrophic Lateral Sclerosis | Jing/2024 | ebi-a-GCST90027164 | European Bioinformatics Institute | 27205 | 110881 | 10 | 0.961 | 0.381 | 2.424 |  | 0.600 | 0.237 | 1.521 |  | 7.504 | 0.000 | 221802 |  | Insufficient evidence |
| Autism Spectrum Disorder | Li/2024b | ieu-a-1185 | iPSYCH-PGC | 18382 | 27969 | 13 | 1.156 | 0.392 | 3.407 |  | 0.910 | 0.308 | 2.695 |  | 2.508 | 0.000 | 1123597 |  | Insufficient evidence |
|  | *De novo MR 2024* | finn-b-F5_AUTISM |  | 293 | 216829 | 17 | 0.204 | 0.003 | 13.99 |  | 0.256 | 0.001 | 69.52 |  |  |  |  |  |  |
|  |  | **Meta-analysis** |  |  |  |  | 1.039 | 0.365 | 2.962 |  | 0.870 | 0.300 | 2.522 |  |  |  |  | 0.943 |  |
| Major Depressive Disorder | Liu/2023 |  | 23andMe_307k. UK Biobank. PGC_139k | 246363 | 561190 | 128 | 1.138 | 1.020 | 1.280 |  | 1.110 | 0.990 | 1.250 |  | 0.750 | 0.480 | 1.160 |  | Suggestive evidence |
| Anxiety | Liu/2023 |  | Integrative Psychiatric Research (iPSYCH) | 4584 | 19225 | 125 | 1.323 | 0.830 | 2.120 |  | 1.140 | 0.620 | 2.100 |  | 6.820 | 0.860 | 54.06 |  | Insufficient evidence |
| Depression | Guo/2024 | finn-b-F5_DEPRESSIO | Finngen |  |  | 10 | 2.508 | 1.258 | 4.997 |  | 2.985 | 1.222 | 7.295 |  | 1.702 | 0.000 | 10224 |  | Robust evidence |
| Bipolar Disorder | Li/2024 | ieu-b-5110 | PGC Bipolar Disorder Working Group of the Psychiatric Genomics Consortium | 41917 | 371549 | 6 | 2.916 | 1.119 | 7.594 |  | 2.570 | 0.807 | 8.183 |  | 29.03 | 0.000 | 7131084 |  | Robust evidence |
|  | *De novo MR 2024* | finn-b-F5_BIPO |  | 4501 | 192220 | 17 | 4.137 | 1.126 | 15.21 |  | 4.129 | 0.711 | 23.98 |  | 0.207 | 0.000 | 481918 |  |  |
|  |  | **Meta-analysis** |  |  |  |  | 3.297 | 1.525 | 7.128 |  | 2.966 | 1.127 | 7.804 |  | 0.447 | 0.003 | 60.04 | 0.002 |  |
| Insomnia | Liu/2023 |  | UK Biobank. 23andMe | 397959 | 933051 | 117 | 1.000 | 0.890 | 1.130 |  | 1.000 | 0.870 | 1.150 |  | 0.760 | 0.480 | 1.200 |  | Insufficient evidence |
| **CARDIOVASCULAR SYSTEM** |  |  |  |  |  |  |  |  |  |  |  |  |  |  |  |  |  |  |  |
| Hypertension | Cai/2024 | Finn-b-I9_hypertension | Finngen | 95462 | 265626 | 17 | 1.010 | 0.710 | 1.440 |  | 0.940 | 0.590 | 1.500 |  |  |  |  |  | Insufficient evidence |
| Angina Pectoris | Huang/2023 | ukb-a-532 | UK Biobank | 4837 | 332362 | 17 | 1.000 | 0.980 | 1.020 |  | 1.010 | 0.990 | 1.030 |  | 1.090 | 0.920 | 1.300 |  | Insufficient evidence |
|  | *De novo MR 2024* | finn-b-I9_ANGINA |  | 18168 | 18784 | 17 | 1.214 | 0.557 | 2.644 |  | 1.290 | 0.483 | 3.443 |  | 0.151 | 0.000 | 961.1 |  |  |
| Acute Myocardial Infarction | Huang/2023 | ukb-a-533 | UK Biobank | 3927 | 333272 | 17 | 1.000 | 0.990 | 1.020 |  | 1.000 | 0.980 | 1.020 |  | 1.120 | 0.910 | 1.380 |  | Insufficient evidence |
|  | *De novo MR 2024* | finn-b-I9_MI |  | 12801 | 18784 | 17 | 1.150 | 0.506 | 2.610 |  | 1.440 | 0.467 | 4.443 |  | 9.709 | 0.001 | 99738 |  |  |
| Chronic Ischaemic Heart Disease | Huang/2023 | ukb-a-534 | UK Biobank | 8755 | 328444 | 17 | 1.000 | 0.970 | 1.020 |  | 0.990 | 0.960 | 1.020 |  | 1.200 | 0.910 | 1.600 |  | Insufficient evidence |
| Cerebral Infarction | Huang/2023 | ukb-d-I63 | UK Biobank | 2353 | 358841 | 17 | 1.000 | 0.990 | 1.010 |  | 1.000 | 0.980 | 1.010 |  | 0.940 | 0.850 | 1.050 |  | Insufficient evidence |
| Unstable Angina | Huang/2023 | ukb-b-12047 | UK Biobank |  |  | 17 | 1.000 | 0.990 | 1.010 |  | 1.000 | 0.990 | 1.010 |  | 1.030 | 0.930 | 1.140 |  | Insufficient evidence |
|  | *De novo MR 2024* | finn-b-I9_UAP |  | 7058 | 197630 | 17 | 0.950 | 0.309 | 2.921 |  | 0.504 | 0.121 | 2.089 |  | 141.3 | 0.001 | 36701599 |  |  |
| Coronary Heart Disease | Feng/2023 |  | Finngen | 21012 | 197780 | 15 | 1.070 | 0.690 | 1.680 |  | 0.960 | 0.550 | 1.660 |  | 0.550 | 0.090 | 3.400 |  | Insufficient evidence |
|  | Feng/2023 |  | CARDIoGRAMplusC4D | 60801 | 123504 | 15 | 1.090 | 0.800 | 1.480 |  | 1.410 | 0.950 | 2.080 |  | 0.810 | 0.230 | 2.840 |  |  |
|  |  | **Meta-analysis** |  |  |  |  | 1.083 | 0.841 | 1.395 |  | 1.240 | 0.901 | 1.707 |  | 0.715 | 0.254 | 2.008 | 0.534 |  |
| Stroke | Feng/2023 |  | UK Biobank | 9298 |  | 15 | 0.590 | 0.240 | 1.430 |  |  |  |  |  |  |  |  |  | Insufficient evidence |
|  | Feng/2023 |  | Finngen | 12632 | 200315 | 15 | 1.030 | 0.620 | 1.730 |  | 0.850 | 0.470 | 1.540 |  |  |  |  |  |  |
|  | Feng/2023 |  | MEGASTROKE | 40585 | 406111 | 15 | 0.990 | 0.740 | 1.340 |  | 0.740 | 0.500 | 1.070 |  | 0.630 | 0.190 | 2.120 |  |  |
|  |  | **Meta-analysis** |  |  |  |  | 0.960 | 0.750 | 1.229 |  | 0.770 | 0.559 | 1.061 |  |  |  |  | 0.748 |  |
| Ischaemic Stroke | Feng/2023 |  | UK Biobank | 7264 |  | 15 | 0.690 | 0.250 | 1.910 |  |  |  |  |  |  |  |  |  | Insufficient evidence |
|  | Feng/2023 |  | Finngen | 10551 | 202223 | 15 | 0.880 | 0.510 | 1.530 |  | 0.860 | 0.450 | 1.630 |  | 5.980 | 0.810 | 44.05 |  |  |
|  | Feng/2023 |  | MEGASTROKE | 34217 | 406111 | 15 | 0.960 | 0.680 | 1.360 |  | 0.750 | 0.500 | 1.140 |  | 0.380 | 0.100 | 1.460 |  |  |
|  |  | **Meta-analysis** |  |  |  |  | 0.915 | 0.690 | 1.212 |  | 0.780 | 0.552 | 1.104 |  | 0.894 | 0.294 | 2.721 | 0.536 |  |
| Heart Failure | Feng/2023 |  | UK Biobank | 11773 |  | 15 | 0.770 | 0.340 | 1.750 |  |  |  |  |  |  |  |  |  | Suggestive evidence |
|  | Feng/2023 |  | Finngen | 23701 | 171390 | 15 | 1.050 | 0.750 | 1.480 |  | 1.170 | 0.750 | 1.830 |  | 3.560 | 0.980 | 12.89 |  |  |
|  | Feng/2023 |  | HERMES | 47309 | 930014 | 15 | 1.380 | 1.060 | 1.800 |  | 1.620 | 1.150 | 2.280 |  | 1.450 | 0.500 | 4.160 |  |  |
|  |  | **Meta-analysis** |  |  |  |  | 1.209 | 0.987 | 1.480 |  | 1.436 | 1.095 | 1.884 |  | 2.083 | 0.919 | 4.721 | 0.066 |  |
| Atrial Fibrillation | Feng/2023 |  | UK Biobank | 25915 |  | 15 | 0.740 | 0.420 | 1.330 |  |  |  |  |  |  |  |  |  | Insufficient evidence |
|  | Feng/2023 |  | Finngen | 22068 | 94858 | 15 | 1.220 | 0.610 | 2.470 |  | 0.980 | 0.510 | 1.900 |  | 4.560 | 0.280 | 75.65 |  |  |
|  | Feng/2023 |  | Nielson | 60662 | 970174 | 15 | 0.980 | 0.790 | 1.210 |  | 0.870 | 0.670 | 1.130 |  | 0.830 | 0.350 | 1.970 |  |  |
|  |  | **Meta-analysis** |  |  |  |  | 0.966 | 0.797 | 1.170 |  | 0.884 | 0.694 | 1.127 |  | 0.963 | 0.422 | 2.197 | 0.722 |  |
| Atherosclerotic Heart Disease | Huang/2023 | ukb-b-1668 | UK Biobank |  |  | 17 | 1.010 | 0.990 | 1.030 |  | 1.000 | 0.980 | 1.030 |  | 1.090 | 0.860 | 1.390 |  | Insufficient evidence |
| **RESPIRATORY SYSTEM** |  |  |  |  |  |  |  |  |  |  |  |  |  |  |  |  |  |  |  |
| Chronic Obstructive Pulmonary Disease | Lai/2023 | finn-b-J10_COPD | Finngen | 6915 | 186723 | 17 | 0.917 | 0.355 | 2.369 |  | 1.408 | 0.392 | 5.507 |  | 0.006 | 0.000 | 234.5 |  | Insufficient evidence |
| Asthma | Yang/2023b | finn-b-J10_ASTHMA | Finngen | 20629 | 135449 | 17 | 1.230 | 0.558 | 2.710 |  | 0.987 | 0.403 | 2.416 |  | 4.737 | 0.000 | 35769 |  | Insufficient evidence |
|  | *De novo MR 2024* | ebi-a-GCST90014325 |  | 56167 | 352255 | 17 | 1.098 | 0.683 | 1.765 |  | 1.380 | 0.837 | 2.273 |  | 0.142 | 0.001 | 27.86 |  |  |
|  |  | **Meta-analysis** |  |  |  |  | 1.132 | 0.753 | 1.700 |  | 1.274 | 0.824 | 1.971 |  |  |  |  | 0.551 |  |
| Idiopathic Pulmonary Fibrosis | Lai/2023 | finn-b-IPF | Finngen | 1028 | 196986 | 17 | 2.246 | 0.136 | 36.96 |  | 7.417 | 0.224 | 244.7 |  | 0.019 | 0.000 | 1103000000000 |  | Insufficient evidence |
| Obstructive Sleep Apnea | Lai/2023 | finn-b-G6_SLEEPAPNO | Finngen | 16761 | 201194 | 17 | 3.072 | 0.723 | 13.06 |  |  |  |  |  |  |  |  |  | Non-evaluable evidence |
| **DIGESTIVE SYSTEM** |  |  |  |  |  |  |  |  |  |  |  |  |  |  |  |  |  |  |  |
| Gastroesophageal Reflux Disease | Zou/2023 |  | Finngen | 22867 | 292256 | 17 | 1.911 | 1.090 | 3.352 |  | 1.750 | 0.866 | 3.534 |  | 0.002 | 0.000 | 0.520 |  | Suggestive evidence |
|  | Liu/2024b | ebi-a-GCST90000514 | European Bioinformatics Institute | 12908 | 473524 | 9 | 1.870 | 1.280 | 2.750 |  | 1.560 | 0.950 | 2.550 |  | 0.710 | 0.010 | 64.25 |  |  |
|  |  | **Meta-analysis** |  |  |  |  | 1.883 | 1.373 | 2.583 |  | 1.620 | 1.082 | 2.427 |  | 0.068 | 0.002 | 2.043 | <0.001 |  |
| Barrett’s Esophagus | Zou/2023 |  | Finngen | 946 | 292256 | 17 | 0.216 | 0.013 | 3.625 |  | 0.023 | 0.001 | 0.690 |  | 0.001 | 0.000 | 96000000000 |  | Suggestive evidence |
|  | Junhai/2024 | <https://doi.org/10.1136/gutjnl-2020-323906> | Esophageal cancer consortium | 13358 | 43071 | 10 | 20.21 | 7.430 | 54.96 |  | 18.49 | 4.630 | 73.95 |  | 703.1 | 0.000 | 7290000000 |  |  |
|  |  | **Meta-analysis** |  |  |  |  | 12.15 | 4.732 | 31.19 |  | 6.675 | 1.864 | 23.90 |  | 44.43 | 0.000 | 79869211 | <0.001 |  |
| Esophageal Cancer | Zou/2023 |  | Finngen | 503 | 259583 | 17 | 9.756 | 0.412 | 230.9 |  | 65.22 | 0.844 | 5041 |  | 1500000000000000 | 1.387 | 1600000000000000000000000000000 |  | Suggestive evidence |
| Colorectal Cancer | Zhang/2024 | ebi-a-GCST012876 | European Bioinformatics Institute | 11895 | 14659 | 17 | 0.672 | 0.271 | 1.667 |  | 0.778 | 0.217 | 2.788 |  | 0.079 | 0.000 | 1635 |  | Insufficient evidence |
|  | *De novo MR 2024* | finn-b-C3_COLORECTAL |  | 3022 | 215770 | 17 | 1.068 | 0.279 | 4.087 |  | 0.953 | 0.156 | 5.838 |  | 0.000 | 0.000 | 1031 |  |  |
|  |  | **Meta-analysis** |  |  |  |  | 0.777 | 0.366 | 1.649 |  | 0.832 | 0.293 | 2.363 |  |  |  |  | 0.511 |  |
| Cholelithiasis | Xie/2024b | GCST90018819 | European Bioinformatics Institute | 26122 | 461431 | 9 | 0.840 | 0.460 | 1.540 |  | 0.731 | 0.335 | 1.597 |  | 0.003 | 0.001 | 3.373 |  | Insufficient evidence |
| Chronic Pancreatitis | Mao/2023 |  | Finngen | 2659 | 273442 | 17 | 0.349 | 0.075 | 1.629 |  | 0.167 | 0.024 | 1.145 |  | 0.031 | 0.000 | 1048000 |  | Insufficient evidence |
| Acute Pancreatitis | Mao/2023 |  | Finngen | 4648 | 273442 | 17 | 0.373 | 0.100 | 1.393 |  | 0.234 | 0.054 | 1.016 |  | 3.841 | 0.789 | 187000000000 |  | Insufficient evidence |
| Umbilical Hernia | Yang/2024b | finn-b-K11_UMBHER | Finngen | 4224 | 190557 | 17 | 2.393 | 0.756 | 7.577 |  | 5.038 | 1.021 | 24.86 |  | 0.001 | 0.000 | 219.8 |  | Suggestive evidence |
| Ventral Hernia | Yang/2024b | finn-b-K11_VENTHER | Finngen | 3737 | 190557 | 17 | 4.475 | 1.087 | 18.43 |  | 5.554 | 1.058 | 29.15 |  | 66.84 | 0.000 | 591000000 |  | Robust evidence |
| Inguinal Hernia | Yang/2024b | finn-b-K11_HERING | Finngen | 17096 | 190557 | 17 | 0.881 | 0.384 | 2.020 |  | 0.692 | 0.259 | 1.844 |  | 36.78 | 0.004 | 371200 |  | Insufficient evidence |
| **ENDOCRINE AND METABOLIC DISORDERS** |  |  |  |  |  |  |  |  |  |  |  |  |  |  |  |  |  |  |  |
| Gout | Ou/2024 |  | Finngen | 8489 |  | 17 | 1.279 | 0.462 | 3.546 |  | 2.095 | 0.627 | 7.004 |  | 0.421 | 0.000 | 41508 |  | Insufficient evidence |
| **CANCER / NEOPLASMS** |  |  |  |  |  |  |  |  |  |  |  |  |  |  |  |  |  |  |  |
| Breast Cancer | Wang/2023b | ieu-a-1126 | BCAC | 122977 | 105974 | 17 | 0.671 | 0.284 | 1.586 |  | 0.937 | 0.581 | 1.512 |  | 0.093 | 0.000 | 549.3 |  | Insufficient evidence |
| Breast Cancer ER- | Wang/2023b | ieu-1-1128 | BCAC | 21468 | 105974 | 16 | 0.844 | 0.428 | 1.665 |  | 0.842 | 0.365 | 1.943 |  | 18.90 | 0.012 | 27814 |  | Insufficient evidence |
| Breast Cancer ER+ | Wang/2023b | ieu-1-1127 | BCAC | 69501 | 105974 | 17 | 0.701 | 0.300 | 1.634 |  | 0.961 | 0.543 | 1.703 |  | 0.063 | 0.000 | 898.5 |  | Insufficient evidence |
| Lung Cancer | Yan/2023 | [GCST004748](https://www.ebi.ac.uk/gwas/studies/GCST004748) | European Bioinformatics Institute | 29266 |  | 10 | 1.265 | 0.577 | 2.771 |  | 1.706 | 0.536 | 5.428 |  | 0.011 | 0.000 | 8070 |  | Insufficient evidence |
| Lung Adenocarcinoma | Yan/2023 | [GCST004744](https://www.ebi.ac.uk/gwas/studies/GCST004744) | European Bioinformatics Institute | 11273 |  | 9 | 1.751 | 0.559 | 5.480 |  | 1.455 | 0.315 | 6.726 |  | 0.001 | 0.000 | 503.2 |  | Insufficient evidence |
| Squamus Cell Lung Cancer | Yan/2023 | [GCST004750](https://www.ebi.ac.uk/gwas/studies/GCST004750) | European Bioinformatics Institute | 7426 |  | 10 | 0.866 | 0.247 | 3.041 |  | 0.665 | 0.119 | 3.733 |  | 0.002 | 0.000 | 16500 |  | Insufficient evidence |
| Small Cell Lung Cancer | Yan/2023 | [GCST004746](https://www.ebi.ac.uk/gwas/studies/GCST004746) | European Bioinformatics Institute | 2664 |  | 10 | 0.623 | 0.860 | 4.505 |  | 0.191 | 0.120 | 3.128 |  | 2800 | 0.000 | 5340000000000000 |  | Insufficient evidence |
| Prostate Cancer | Zhan/2023 | ieu-b-85 | PRACTICAL | 79148 |  | 20 | 1.250 | 0.610 | 2.550 |  |  |  |  |  |  |  |  |  | Non-evaluable evidence |
|  | Zhan/2023 | finn-bC3_PROSTATE | Finngen | 6311 |  | 7 | 3.250 | 0.640 | 16.62 |  |  |  |  |  |  |  |  |  |  |
|  |  | **Meta-analysis** |  |  |  |  | 1.459 | 0.758 | 2.808 |  |  |  |  |  |  |  |  | 0.258 |  |
| Cutaneous Melanoma | Wang/2024 | Ieu-b-4969 | UK Biobank | 3751 | 372016 |  | 1.001 | 0.990 | 1.013 |  | 1.003 | 0.986 | 1.020 |  | 0.981 | 0.860 | 1.120 |  | Insufficient evidence |
| Keratinocyte Skin Cancer | Wang/2024 | Ieu-b-4959 | UK Biobank | 23694 | 372016 |  | 1.002 | 0.961 | 1.046 |  | 1.010 | 0.966 | 1.056 |  | 1.120 | 0.685 | 1.833 |  | Insufficient evidence |
| **UROLOGICAL AND REPRODUCTIVE SYSTEM** |  |  |  |  |  |  |  |  |  |  |  |  |  |  |  |  |  |  |  |
| Calculus of Kidney and Ureter | Lin/2023 | N14_CALCUKIDUR | Finngen | 8597 |  | 12 | 0.979 | 0.313 | 3.063 |  | 0.683 | 0.214 | 2.184 |  | 0.116 | 0.000 | 44167 |  | Insufficient evidence |
| Calculus of Lower Urinary Tract | Lin/2023 | N14_CALCULOWER | Finngen | 1224 |  | 12 | 0.287 | 0.038 | 2.181 |  | 0.136 | 0.008 | 2.352 |  | 0.894 | 0.000 | 3904356007 |  | Insufficient evidence |
|  | *De novo MR 2024* | ukb-e-594_CSA |  | 206 | 8639 | 15 | 0.603 | 0.002 | 160.9 |  | 0.032 | 0.000 | 75.30 |  | 0.052 | 0.000 | 20410000000000000000000000 |  |  |
|  |  | **Meta-analysis** |  |  |  |  | 0.313 | 0.047 | 2.099 |  |  |  |  |  |  |  |  | 0.232 |  |
| Male Infertility | Chen/2024 | finn- b-N14_MALEINFERT | Finngen | 680 | 72799 | 17 | 54.79 | 2.901 | 1031 |  | 19.70 | 0.434 | 890.9 |  | 0.000 | 0.000 | 4708600000 |  | Suggestive evidence |
| Female Infertility | Chen/2024 | finn- b-N14_FEMALEINFERT | Finngen | 6481 | 68969 | 17 | 0.954 | 0.370 | 2.459 |  | 0.580 | 0.156 | 2.155 |  | 0.002 | 0.000 | 70.49 |  | Insufficient evidence |
| **IMMUNE MEDIATED DISEASES** |  |  |  |  |  |  |  |  |  |  |  |  |  |  |  |  |  |  |  |
| AQP4‑positive Neuromyelitis Optica Spectrum Disorders | Wang/2023 | GCST006937 | European Bioinformatics Institute | 132 | 784 | 6 | 25429 | 0.000 | 2.148E+19 |  | 94160 | 0.000 | 3.888E+21 |  | 5.88E+26 | 0.000 | 1.9989E+75 |  | Insufficient evidence |
| **INFECTIOUS DISEASES** |  |  |  |  |  |  |  |  |  |  |  |  |  |  |  |  |  |  |  |
| Syphilis | Xie/2024 |  | Finngen | 350 | 212952 |  | 95.12 | 2.130 | 4240 |  |  |  |  |  |  |  |  |  | Non-evaluable evidence |
| COVID-19 (susceptibility) | Li/2024c | <https://www.covid19hg.org/results/r7/> | | 122.616 | 2475240 | 10 | 1.070 | 0.790 | 1.450 |  | 0.952 | 0.625 | 1.450 |  | 4.376 | 0.177 | 108.2 |  | Insufficient evidence |
| COVID-19 (hospitalization) | Li/2024c | <https://www.covid19hg.org/results/r7/> | | 32.519 | 2062805 | 10 | 1.360 | 0.640 | 2.880 |  | 0.989 | 0.388 | 2.515 |  | 363.5 | 0.236 | 559021 |  | Insufficient evidence |
| COVID-19 (severity) | Li/2024c | <https://www.covid19hg.org/results/r7/> | | 13.769 | 1072442 | 10 | 1.370 | 0.410 | 4.610 |  | 0.408 | 0.097 | 1.715 |  | 0.246 | 0.000 | 134521 |  | Insufficient evidence |
| **PERIODONTAL DISEASES** |  |  |  |  |  |  |  |  |  |  |  |  |  |  |  |  |  |  |  |
| Acute Gingivitis | Ying/2024 | finn-b-K11_GINGIVITIS_ACUTE | Finngen |  |  | 17 | 1.280 | 0.000 | 918.8 |  |  |  |  |  |  |  |  |  | Non-evaluable evidence |
| Chronic Gingivitis | Ying/2024 | finn-b-K11_GINGIVITIS_CHRONIC | Finngen |  |  | 17 | 0.480 | 0.040 | 5.610 |  |  |  |  |  |  |  |  |  | Non-evaluable evidence |
| Acute Periodontitis | Ying/2024 | finn-b-K11_PERIODON_ACUTE | Finngen |  |  | 17 | 1.850 | 0.020 | 174.5 |  |  |  |  |  |  |  |  |  | Non-evaluable evidence |
| Chronic Periodontitis | Ying/2024 | finn-b-K11_PERIODON_CHRON | Finngen |  |  | 17 | 0.400 | 0.110 | 1.500 |  |  |  |  |  |  |  |  |  | Non-evaluable evidence |

**Table S5. Mendelian randomization studies, meta-analysis results, and certainty of evidence ratings of salad/raw vegetable intake as exposure**

| **Disease** | **Study** | **GWAS ID** | **Consortium** | **Cases** | **Noncases** | **SNPs** | **IVW** | | |  | **Weighted median** | | |  | **MR- Egger** | | | ***P*-value for meta-analysis** | **Evidence rating** |
| --- | --- | --- | --- | --- | --- | --- | --- | --- | --- | --- | --- | --- | --- | --- | --- | --- | --- | --- | --- |
| **MUSCULOSKELETAL SYSTEM** |  |  |  |  |  |  | **OR** | **LB** | **UB** |  | **OR** | **LB** | **UB** |  | **OR** | **LB** | **UB** |  |
| Knee Osteoarthritis | Xie/2023 | <https://www.cell.com/cell/fulltext/S0092-8674(21)00941-7> | Genetics of Osteoarthritis |  |  | 103 | 0.968 | 0.757 | 1.237 |  | 1.184 | 0.888 | 1.579 |  | 0.757 | 0.337 | 1.702 |  | Insufficient evidence |
|  | Lv/2024 | ebi-a-GCST007090 | European Bioinformatics Institute | 24955 | 378169 | 14 | 0.710 | 0.340 | 1.490 |  | 0.800 | 0.320 | 2.020 |  | 0.130 | 0.000 | 4.670 |  |  |
|  |  | **Meta-analysis** |  |  |  |  | 0.938 | 0.743 | 1.185 |  | 1.143 | 0.869 | 1.505 |  | 0.722 | 0.325 | 1.605 | 0.593 |  |
| Hip Osteoarthritis | Xie/2023 | <https://www.cell.com/cell/fulltext/S0092-8674(21)00941-7> | Genetics of Osteoarthritis |  |  | 106 | 1.253 | 0.950 | 1.651 |  | 1.224 | 0.851 | 1.760 |  | 0.596 | 0.245 | 1.450 |  | Insufficient evidence |
| Spinal Osteoarthritis | Xie/2023 | <https://www.cell.com/cell/fulltext/S0092-8674(21)00941-7> | Genetics of Osteoarthritis |  |  | 108 | 0.933 | 0.719 | 1.211 |  | 1.062 | 0.734 | 1.535 |  | 1.412 | 0.556 | 3.590 |  | Insufficient evidence |
| Hand Osteoarthritis | Xie/2023 | <https://www.cell.com/cell/fulltext/S0092-8674(21)00941-7> | Genetics of Osteoarthritis |  |  | 109 | 1.133 | 0.787 | 1.631 |  | 0.978 | 0.615 | 1.557 |  | 1.253 | 0.382 | 4.105 |  | Insufficient evidence |
| Chronic Knee Pain | Zhou/2023 | ukb-b-8906 | UK Biobank | 7691 | 20979 | 14 | 1.000 | 0.855 | 1.170 |  | 0.932 | 0.797 | 1.091 |  |  |  |  |  | Insufficient evidence |
| Chronic Hip Pain | Zhou/2023 | ukb-b-133 | UK Biobank | 40152 | 11364 | 14 | 0.923 | 0.744 | 1.145 |  | 0.980 | 0.775 | 1.240 |  |  |  |  |  | Insufficient evidence |
| Chronic Back Pain | Zhou/2023 | ukb-b-8463 | UK Biobank | 80588 | 36816 | 14 | 1.020 | 0.907 | 1.148 |  | 1.062 | 0.890 | 1.267 |  |  |  |  |  | Insufficient evidence |
| Chronic Neck/ShoulderPain | Zhou/2023 | ukb-b-16118 | UK Biobank | 72887 | 32509 | 14 | 1.020 | 0.907 | 1.148 |  | 1.000 | 0.838 | 1.193 |  |  |  |  |  | Insufficient evidence |
| Low back pain | Liu/2024 | finn-b-M13_LOWBACKPAIN | Finngen | 13178 | 164682 | 19 | 0.740 | 0.290 | 1.890 |  | 1.040 | 0.350 | 3.070 |  | 0.910 | 0.010 | 87.11 |  | Insufficient evidence |
| Multi-site Chronic Pain | Zhou/2023 | 31194737 |  |  |  | 14 | 0.852 | 0.687 | 1.057 |  | 0.779 | 0.616 | 0.985 |  |  |  |  |  | Suggestive evidence |
| **NERVOUS SYSTEM** |  |  |  |  |  |  |  |  |  |  |  |  |  |  |  |  |  |  |  |
| Migraine | Jareebi/2024 |  | Finngen | 19676 |  | 22 | 0.468 | 0.258 | 0.848 |  |  |  |  |  |  |  |  |  | Non-evaluable evidence |
|  | Jareebi/2024 |  | UK Biobank | ≈14000 |  | 22 | 1.000 | 0.900 | 1.110 |  |  |  |  |  |  |  |  |  |  |
|  |  | **Meta-analysis** |  |  |  |  | 0.977 | 0.881 | 1.084 |  |  |  |  |  |  |  |  | 0.664 |  |
| Migraine with Aura | Liu/2023 |  | Finngen |  |  | 146 | 0.741 | 0.530 | 1.040 |  | 0.680 | 0.410 | 1.110 |  | 0.560 | 0.170 | 1.850 |  | Insufficient evidence |
| Migraine without Aura | Liu/2023 |  | Finngen |  |  | 146 | 0.794 | 0.550 | 1.150 |  | 0.680 | 0.400 | 1.160 |  | 0.270 | 0.070 | 0.990 |  | Suggestive evidence |
| Chronic Headache | Zhou/2023 | ukb-b-13092 | UK Biobank | 41719 | 4955 | 14 | 1.062 | 0.926 | 1.218 |  | 1.000 | 0.838 | 1.193 |  |  |  |  |  | Insufficient evidence |
| Amyotrophic Lateral Sclerosis | Jing/2024 | ebi-a-GCST90027164 | European Bioinformatics Institute | 27205 | 110881 | 20 | 1.472 | 0.809 | 2.678 |  | 1.240 | 0.540 | 2.849 |  | 0.460 | 0.022 | 9.689 |  | Insufficient evidence |
| Autism Spectrum Disorder | Li/2024b | ieu-a-1185 | iPSYCH-PGC | 18382 | 27969 | 10 | 1.668 | 0.618 | 4.504 |  | 3.066 | 0.770 | 12.21 |  | 0.136 | 0.000 | 2106 |  | Suggestive evidence |
|  | *De novo MR 2024* | finn-b-F5_AUTISM |  | 293 | 216829 | 17 | 0.038 | 0.000 | 19.50 |  | 0.467 | 0.000 | 529.4 |  | 6882000000000 | 140.2 | 337900000000000000000000 |  |  |
|  |  | **Meta-analysis** |  |  |  |  | 1.512 | 0.567 | 4.029 |  | 2.860 | 0.737 | 11.10 |  |  |  |  | 0.408 |  |
| Bipolar Disorder | Li/2024 | ieu-b-5110 | PGC Bipolar Disorder Working Group of the Psychiatric Genomics Consortium | 41917 | 371549 | 6 | 1.408 | 0.160 | 12.42 |  | 0.903 | 0.238 | 3.423 |  | 357.3 | 0.075 | 17147647075 |  | Insufficient evidence |
|  | *De novo MR 2024* | finn-b-F5_BIPO |  | 4501 | 192220 | 17 | 0.572 | 0.124 | 2.650 |  | 1.144 | 0.144 | 9.066 |  | 364.7 | 0.535 | 248630 |  |  |
|  |  | **Meta-analysis** |  |  |  |  | 0.771 | 0.220 | 2.700 |  | 0.968 | 0.316 | 2.968 |  |  |  |  | 0.684 |  |
| Major Depressive Disorder | Liu/2023 |  | UK Biobank | 246363 | 561190 | 149 | 1.095 | 1.000 | 1.200 |  | 1.060 | 0.960 | 1.170 |  | 1.370 | 0.990 | 1.920 |  | Insufficient evidence |
| Anxiety | Liu/2023 |  | Integrative Psychiatric Research (iPSYCH) | 4584 | 19225 | 140 | 1.213 | 0.810 | 1.820 |  | 1.390 | 0.800 | 2.400 |  | 1.640 | 0.360 | 7.450 |  | Insufficient evidence |
| Insomnia | Liu/2023 |  | UK Biobank | 397959 | 933051 | 138 | 1.045 | 0.930 | 1.170 |  | 1.070 | 0.940 | 1.210 |  | 1.150 | 0.760 | 1.750 |  | Insufficient evidence |
| **CARDIOVASCULAR SYSTEM** |  |  |  |  |  |  |  |  |  |  |  |  |  |  |  |  |  |  |  |
| Hypertension | Cai/2024 | Finn-b-I9_hypertension | Finngen | 95462 | 265626 | 22 | 0.580 | 0.370 | 0.900 |  | 0.740 | 0.090 | 6.150 |  | 0.780 | 0.450 | 1.350 |  | Suggestive evidence |
| Angina Pectoris | Huang/2023 | ukb-a-532 | UK Biobank | 4837 | 332362 | 17 | 1.000 | 0.980 | 1.020 |  | 1.010 | 0.990 | 1.040 |  | 1.080 | 0.980 | 1.190 |  | Robust evidence |
|  | *De novo MR 2024* | finn-b-I9_ANGINA |  | 18168 | 18784 | 17 | 0.358 | 0.157 | 0.816 |  | 0.460 | 0.143 | 1.477 |  | 0.006 | 0.000 | 0.252 |  |  |
| Acute Myocardial Infarction | Huang/2023 | ukb-a-533 | UK Biobank | 3927 | 333272 | 17 | 0.990 | 0.980 | 1.010 |  | 0.980 | 0.960 | 1.000 |  | 1.050 | 0.970 | 1.130 |  | Insufficient evidence |
|  | *De novo MR 2024* | finn-b-I9_MI |  | 12801 | 18784 | 17 | 0.416 | 0.156 | 1.112 |  | 0.699 | 0.190 | 2.574 |  | 0.155 | 0.002 | 16.46 |  |  |
| Chronic Ischaemic Heart Disease | Huang/2023 | ukb-a-534 | UK Biobank | 8755 | 328444 | 17 | 1.000 | 0.970 | 1.030 |  | 0.990 | 0.960 | 1.020 |  | 1.180 | 1.040 | 1.330 |  | Suggestive evidence |
| Cerebral Infarction | Huang/2023 | ukb-d-I63 | UK Biobank | 2353 | 358841 | 17 | 1.000 | 0.990 | 1.020 |  | 0.990 | 0.980 | 1.010 |  | 0.970 | 0.900 | 1.030 |  | Insufficient evidence |
| Unstable Angina | Huang/2023 | ukb-b-12047 | UK Biobank |  |  | 16 | 0.990 | 0.970 | 1.000 |  | 0.980 | 0.970 | 1.000 |  | 0.990 | 0.900 | 1.090 |  | Suggestive evidence |
|  | *De novo MR 2024* | finn-b-I9_UAP |  | 7058 | 197630 | 17 | 0.410 | 0.113 | 1.494 |  | 0.360 | 0.069 | 1.867 |  | 0.001 | 0.000 | 0.105 |  |  |
| Atherosclerotic Heart Disease | Huang/2023 | ukb-b-1668 | UK Biobank |  |  | 18 | 0.990 | 0.970 | 1.020 |  | 0.990 | 0.960 | 1.010 |  | 1.120 | 1.000 | 1.250 |  | Insufficient evidence |
| Coronary Heart Disease | Feng/2023 |  | Finngen | 21012 | 197780 | 27 | 1.060 | 0.830 | 1.350 |  | 1.100 | 0.780 | 1.570 |  | 0.780 | 0.140 | 4.360 |  | Insufficient evidence |
|  | Feng/2023 |  | CARDIoGRAMplusC4D | 60801 | 123504 | 28 | 0.880 | 0.720 | 1.080 |  | 0.820 | 0.640 | 1.060 |  | 0.830 | 0.200 | 3.400 |  |  |
|  |  | **Meta-analysis** |  |  |  |  | 0.950 | 0.813 | 1.110 |  | 0.907 | 0.739 | 1.113 |  | 0.809 | 0.271 | 2.415 | 0.517 |  |
| Stroke | Feng/2023 |  | UK Biobank | 9298 |  | 28 | 0.920 | 0.640 | 1.320 |  |  |  |  |  |  |  |  |  | Insufficient evidence |
|  | Feng/2023 |  | Finngen | 12632 | 200315 | 27 | 0.850 | 0.650 | 1.120 |  | 0.800 | 0.550 | 1.140 |  | 0.880 | 0.130 | 6.170 |  |  |
|  | Feng/2023 |  | MEGASTROKE | 40585 | 406111 | 28 | 0.910 | 0.770 | 1.070 |  | 0.910 | 0.720 | 1.140 |  | 0.610 | 0.200 | 1.850 |  |  |
|  |  | **Meta-analysis** |  |  |  |  | 0.897 | 0.787 | 1.023 |  | 0.877 | 0.722 | 1.065 |  | 0.668 | 0.255 | 1.752 | 0.104 |  |
| Ischaemic Stroke | Feng/2023 |  | UK Biobank | 7264 |  | 28 | 0.870 | 0.580 | 1.310 |  |  |  |  |  |  |  |  |  | Insufficient evidence |
|  | Feng/2023 |  | Finngen | 10551 | 202223 | 27 | 0.820 | 0.620 | 1.080 |  | 0.840 | 0.570 | 1.240 |  | 0.900 | 0.130 | 6.320 |  |  |
|  | Feng/2023 |  | MEGASTROKE | 34217 | 406111 | 28 | 0.940 | 0.790 | 1.130 |  | 1.120 | 0.870 | 1.440 |  | 0.670 | 0.200 | 2.240 |  |  |
|  |  | **Meta-analysis** |  |  |  |  | 0.899 | 0.781 | 1.035 |  | 1.029 | 0.833 | 1.271 |  | 0.727 | 0.261 | 2.029 | 0.139 |  |
| Heart Failure | Feng/2023 |  | UK Biobank | 11773 |  | 28 | 0.830 | 0.600 | 1.150 |  |  |  |  |  |  |  |  |  | Insufficient evidence |
|  | Feng/2023 |  | HERMES | 47309 | 930014 | 28 | 1.090 | 0.940 | 1.270 |  | 1.100 | 0.900 | 1.350 |  | 0.790 | 0.290 | 2.180 |  |  |
|  |  | **Meta-analysis** |  |  |  |  | 1.039 | 0.906 | 1.191 |  |  |  |  |  |  |  |  | 0.584 |  |
| Atrial Fibrillation | Feng/2023 |  | UK Biobank | 25915 |  | 28 | 0.820 | 0.660 | 1.030 |  |  |  |  |  |  |  |  |  | Suggestive evidence |
|  | Feng/2023 |  | Finngen | 22068 | 94858 | 27 | 0.920 | 0.610 | 1.370 |  | 0.980 | 0.640 | 1.500 |  | 0.030 | 0.000 | 0.450 |  |  |
|  | Feng/2023 |  | European Bioinformatics Institute | 60662 | 970174 | 28 | 1.030 | 0.830 | 1.290 |  | 1.260 | 1.020 | 1.550 |  | 0.760 | 0.160 | 3.540 |  |  |
|  |  | **Meta-analysis** |  |  |  |  | 0.920 | 0.795 | 1.065 |  | 1.200 | 0.994 | 1.448 |  |  |  |  | 0.263 |  |
| **RESPIRATORY SYSTEM** |  |  |  |  |  |  |  |  |  |  |  |  |  |  |  |  |  |  |  |
| Chronic Obstructive Pulmonary Disease | Lai/2023 | finn-b-J10_COPD | Finngen | 6915 | 186723 | 19 | 0.524 | 0.109 | 2.506 |  | 0.335 | 0.064 | 1.764 |  | 17.598 | 0.009 | 31086 |  | Insufficient evidence |
| Asthma | Yang/2023b | finn-b-J10_ASTHMA | Finngen | 20629 | 135449 | 18 | 0.810 | 0.287 | 2.284 |  | 2.264 | 0.767 | 6.683 |  | 16.837 | 0.155 | 1825 |  | Insufficient evidence |
|  | *De novo MR 2024* | ebi-a-GCST90014325 |  | 56167 | 352255 | 18 | 0.724 | 0.449 | 1.169 |  | 0.815 | 0.482 | 1.376 |  | 0.217 | 0.020 | 2.385 |  |  |
|  |  | **Meta-analysis** |  |  |  |  | 0.738 | 0.478 | 1.140 |  | 0.989 | 0.617 | 1.586 |  | 0.535 | 0.063 | 4.526 | 0.172 |  |
| Idiopathic Pulmonary Fibrosis | Lai/2023 | finn-b-IPF | Finngen | 1028 | 196986 | 19 | 1.280 | 0.099 | 16.468 |  | 0.457 | 0.001 | 18.967 |  | 0.000 | 0.000 | 0.066 |  | Suggestive evidence |
| Obstructive Sleep Apnea | Lai/2023 | finn-b-G6_SLEEPAPNO | Finngen | 16761 | 201194 | 19 | 0.619 | 0.267 | 1.143 |  | 0.507 | 0.180 | 1.428 |  | 3.023 | 0.053 | 171.6 |  | Insufficient evidence |
| **DIGESTIVE SYSTEM** |  |  |  |  |  |  |  |  |  |  |  |  |  |  |  |  |  |  |  |
| Gastroesophageal Reflux Disease | Zou/2023 |  | Finngen | 22867 | 292256 | 22 | 0.478 | 0.271 | 0.841 |  | 0.354 | 0.161 | 0.777 |  | 0.295 | 0.021 | 4.052 |  | Suggestive evidence |
|  | Liu/2024b | ebi-a-GCST90000514 | European Bioinformatics Institute | 12908 | 473524 | 10 | 0.840 | 0.600 | 1.180 |  | 0.900 | 0.570 | 1.420 |  | 2.390 | 0.420 | 13.44 |  |  |
|  |  | **Meta-analysis** |  |  |  |  | 0.724 | 0.542 | 0.968 |  | 0.712 | 0.480 | 1.056 |  | 1.269 | 0.299 | 5.396 | 0.029 |  |
| Barrett’s Esophagus | Zou/2023 |  | Finngen | 946 | 292256 | 22 | 0.286 | 0.019 | 4.419 |  | 0.038 | 0.001 | 1.542 |  | 0.000 | 0.000 | 3.671 |  | Robust evidence |
|  | Junhai/2024 | <https://doi.org/10.1136/gutjnl-2020-323906> | Esophageal cancer consortium | 13358 | 43071 | 7 | 0.150 | 0.020 | 0.890 |  | 0.220 | 0.030 | 1.680 |  | 0.600 | 0.000 | 50000 |  |  |
|  |  | **Meta-analysis** |  |  |  |  | 0.188 | 0.037 | 0.952 |  | 0.147 | 0.025 | 0.856 |  | 0.005 | 0.000 | 20.78 | 0.043 |  |
| Esophageal Cancer | Zou/2023 |  | Finngen | 503 | 259583 | 22 | 2.315 | 0.065 | 82.076 |  | 9.682 | 0.081 | 1162 |  | 8.938 | 0.000 | 140000000 |  | Insufficient evidence |
|  | Zhang/2024 | ebi-a-GCST012876 | European Bioinformatics Institute | 11895 | 14659 | 18 | 0.395 | 0.127 | 1.227 |  | 0.677 | 0.168 | 2.724 |  | 4.179 | 0.013 | 1388 |  | Insufficient evidence |
|  | *De novo MR 2024* | finn-b-C3_COLORECTAL |  | 3022 | 215770 | 17 | 1.865 | 0.400 | 8.704 |  | 1.487 | 0.181 | 12.25 |  | 0.013 | 0.000 | 16.94 |  |  |
|  |  | **Meta-analysis** |  |  |  |  | 0.681 | 0.273 | 1.699 |  | 0.860 | 0.269 | 2.749 |  |  |  |  | 0.411 |  |
| Cholelithiasis | Xie/2024b | GCST90018819 | European Bioinformatics Institute | 26122 | 461431 | 15 | 1.260 | 0.720 | 2.240 |  | 1.870 | 0.864 | 4.049 |  | 0.914 | 0.069 | 12.28 |  | Insufficient evidence |
| Chronic Pancreatitis | Mao/2023 |  | Finngen | 2659 | 273442 | 17 | 0.237 | 0.038 | 1.463 |  | 0.370 | 0.034 | 4.069 |  | 12.30 | 0.003 | 57130 |  | Insufficient evidence |
| Acute Pancreatitis | Mao/2023 |  | Finngen | 4648 | 273442 | 17 | 0.319 | 0.064 | 1.575 |  | 0.554 | 0.084 | 3.655 |  | 2.254 | 0.001 | 4374 |  | Insufficient evidence |
| Gallstone Disease | Alyahyawi/2023 |  | Finngen | 19883 | 195144 | 22 | 1.060 | 0.480 | 2.340 |  |  |  |  |  |  |  |  |  | Non-evaluable evidence |
|  | Alyahyawi/2023 |  | UK Biobank | 7682 | 455251 | 22 | 0.980 | 0.960 | 1.000 |  |  |  |  |  |  |  |  |  |  |
| Umbilical Hernia | Yang/2024b | finn-b-K11_UMBHER | Finngen | 4224 | 190557 | 18 | 0.985 | 0.111 | 5.726 |  | 0.797 | 0.111 | 5.726 |  | 1.746 | 0.000 | 11820 |  | Insufficient evidence |
| Ventral Hernia | Yang/2024b | finn-b-K11_VENTHER | Finngen | 3737 | 190557 | 18 | 0.892 | 0.113 | 7.060 |  | 0.294 | 0.037 | 2.331 |  | 18.08 | 0.001 | 305000 |  | Insufficient evidence |
| Inguinal Hernia | Yang/2024b | finn-b-K11_HERING | Finngen | 17096 | 190557 | 18 | 1.473 | 0.598 | 3.629 |  | 0.865 | 0.311 | 2.406 |  | 0.514 | 0.007 | 36.24 |  | Insufficient evidence |
| **ENDOCRINE AND METABOLIC DISORDERS** |  |  |  |  |  |  |  |  |  |  |  |  |  |  |  |  |  |  |  |
| Type 2 Diabetes | Muaddi/2024 |  | UK Biobank | 16183 |  | 22 | 0.980 | 0.950 | 1.010 |  |  |  |  |  |  |  |  |  | Non-evaluable evidence |
|  | Muaddi/2024 |  | Finngen | 32469 |  | 22 | 1.240 | 0.630 | 2.420 |  |  |  |  |  |  |  |  |  |  |
| Gout | Ou/2024 |  | Finngen | 8489 |  | 17 | 1.560 | 0.453 | 5.367 |  | 2.332 | 0.553 | 9.829 |  | 0.005 | 0.000 | 0.746 |  | Suggestive evidence |
| **CANCER / NEOPLASMS** |  |  |  |  |  |  |  |  |  |  |  |  |  |  |  |  |  |  |  |
| Breast Cancer | Wang/2023b | ieu-a-1126 | BCAC | 122977 | 105974 | 16 | 1.084 | 0.696 | 1.688 |  | 1.036 | 0.602 | 1.781 |  | 0.644 | 0.063 | 6.570 |  | Insufficient evidence |
| Breast Cancer ER- | Wang/2023b | ieu-1-1128 | BCAC | 21468 | 105974 | 18 | 1.444 | 0.748 | 2.789 |  | 1.292 | 0.543 | 3.074 |  | 0.175 | 0.006 | 4.835 |  | Insufficient evidence |
| Breast Cancer ER+ | Wang/2023b | ieu-1-1127 | BCAC | 69501 | 105974 | 16 | 1.029 | 0.635 | 1.668 |  | 1.088 | 0.589 | 2.010 |  | 0.838 | 0.065 | 10.71 |  | Insufficient evidence |
| Lung Cancer | Yan/2023 | [GCST004748](https://www.ebi.ac.uk/gwas/studies/GCST004748) | European Bioinformatics Institute | 29266 |  | 13 | 0.352 | 0.160 | 0.774 |  | 0.667 | 0.207 | 2.146 |  | 0.003 | 0.000 | 3.000 |  | Suggestive evidence |
| Lung Adenocarcinoma | Yan/2023 | [GCST004744](https://www.ebi.ac.uk/gwas/studies/GCST004744) | European Bioinformatics Institute | 11273 |  | 15 | 0.378 | 0.136 | 1.054 |  | 0.629 | 0.143 | 2.779 |  | 0.122 | 0.000 | 384 |  | Insufficient evidence |
| Squamus Cell Lung Cancer | Yan/2023 | [GCST004750](https://www.ebi.ac.uk/gwas/studies/GCST004750) | European Bioinformatics Institute | 7426 |  | 15 | 0.103 | 0.031 | 0.340 |  | 0.234 | 0.037 | 1.502 |  | 0.001 | 0.000 | 219.0 |  | Suggestive evidence |
| Small Cell Lung Cancer | Yan/2023 | [GCST004746](https://www.ebi.ac.uk/gwas/studies/GCST004746) | European Bioinformatics Institute | 2664 |  | 14 | 0.161 | 0.022 | 1.151 |  | 0.271 | 0.017 | 4.257 |  | 0.000 | 0.000 | 17.57 |  | Insufficient evidence |
| Prostate Cancer | Zhan/2023 | ieu-b-85 | PRACTICAL | 79148 |  | 21 | 2.150 | 0.870 | 5.310 |  |  |  |  |  |  |  |  |  | Non-evaluable evidence |
|  | Zhan/2023 | finn-bC3_PROSTATE | Finngen | 6311 |  | 8 | 5.440 | 1.200 | 24.70 |  |  |  |  |  |  |  |  |  |  |
|  |  | **Meta-analysis** |  |  |  |  | 2.746 | 1.263 | 5.967 |  |  |  |  |  |  |  |  | 0.011 |  |
| Cutaneous Melanoma | Wang/2024 | Ieu-b-4969 | UKB | 3751 | 372016 |  | 0.996 | 0.984 | 1.009 |  | 0.991 | 0.974 | 1.007 |  | 0.992 | 0.934 | 1.053 |  | Insufficient evidence |
| Keratinocyte Skin Cancer | Wang/2024 | Ieu-b-4959 | UKB | 23694 | 372016 |  | 0.952 | 0.918 | 0.987 |  | 0.950 | 0.910 | 0.991 |  | 0.929 | 0.781 | 1.106 |  | Robust evidence |
| **UROLOGICAL AND REPRODUCTIVE SYSTEM** |  |  |  |  |  |  |  |  |  |  |  |  |  |  |  |  |  |  |  |
| Calculus of Kidney and Ureter | Lin/2023 | N14_CALCUKIDUR | Finngen | 8597 |  | 9 | 0.990 | 0.271 | 3.611 |  | 0.367 | 0.096 | 1.415 |  | 1.883 | 0.005 | 761.8 |  | Insufficient evidence |
| Calculus of Lower Urinary Tract | Lin/2023 | N14_CALCULOWER | Finngen | 1224 |  | 9 | 5.337 | 0.334 | 85.390 |  | 0.871 | 0.031 | 24.56 |  | 3.671 | 0.000 | 1475034 |  | Insufficient evidence |
|  | *De novo MR 2024* | ukb-e-594_CSA |  | 206 | 8639 | 17 | 0.020 | 0.000 | 6.992 |  | 0.030 | 0.000 | 123.1 |  | 0.709 | 0.000 | 2700000000000 |  |  |
|  |  | **Meta-analysis** |  |  |  |  | 1.772 | 0.148 | 21.21 |  |  |  |  |  |  |  |  | 0.652 |  |
| Male Infertility | Chen/2024 | finn- b-N14_MALEINFERT | Finngen | 680 | 72799 | 24 | 0.435 | 0.020 | 9.239 |  | 0.318 | 0.004 | 24.09 |  | 0.003 | 0.000 | 5406 |  | Insufficient evidence |
| Female Infertility | Chen/2024 | finn- b-N14_FEMALEINFERT | Finngen | 6481 | 68969 | 24 | 0.944 | 0.334 | 2.672 |  | 1.482 | 0.363 | 6.050 |  | 1.419 | 0.010 | 202.7 |  | Insufficient evidence |
| **IMMUNE MEDIATED DISEASES** |  |  |  |  |  |  |  |  |  |  |  |  |  |  |  |  |  |  |  |
| AQP4‑positive Neuromyelitis Optica Spectrum Disorders | Wang/2023 | GCST006937 | European Bioinformatics Institute | 132 | 784 | 23 | 5.284 | 0.000 | 598.3 |  | 0.000 | 0.000 | 858.0 |  | 0.000 | 0.000 | 1010000000000000000000000000 |  | Insufficient evidence |
| Ulcerative Colitis | Bu/2024 | finn-b-K11_ULCER | Finngen | 432 |  | 17 | 1.742 | 0.561 | 5.415 |  | 1.129 | 0.231 | 5.512 |  | 0.000 | 0.000 | 4.953 |  | Insufficient evidence |
| **INFECTIOUS DISEASES** |  |  |  |  |  |  |  |  |  |  |  |  |  |  |  |  |  |  |  |
| Syphilis | Xie/2024 |  | Finngen | 350 | 212952 |  | 7.730 | 0.090 | 665.7 |  |  |  |  |  |  |  |  |  | Non-evaluable evidence |
| COVID-19 (susceptibility) | Li/2024c | <https://www.covid19hg.org/results/r7/> | | 122616 | 2475240 | 8 | 0.950 | 0.450 | 1.990 |  | 0.597 | 0.315 | 1.134 |  | 0.658 | 0.003 | 128.4 |  | Insufficient evidence |
| COVID-19 (hospitalization) | Li/2024c | <https://www.covid19hg.org/results/r7/> | | 32.519 | 2062805 | 8 | 1.040 | 0.230 | 4.770 |  | 1.019 | 0.293 | 3.546 |  | 195.6 | 0.014 | 2742770 |  | Insufficient evidence |
| COVID-19 (severity) | Li/2024c | <https://www.covid19hg.org/results/r7/> | | 13.769 | 1072442 | 8 | 0.990 | 0.250 | 3.960 |  | 0.934 | 0.147 | 5.955 |  | 19.10 | 0.003 | 111002 |  | Insufficient evidence |
| **PERIODONTAL DISEASES** |  |  |  |  |  |  |  |  |  |  |  |  |  |  |  |  |  |  |  |
| Acute Gingivitis | Ying/2024 | finn-b-K11_GINGIVITIS_ACUTE | Finngen |  |  | 22 | 0.320 | 0.000 | 980.6 |  |  |  |  |  |  |  |  |  | Non-evaluable evidence |
| Chronic Gingivitis | Ying/2024 | finn-b-K11_GINGIVITIS_CHRONIC | Finngen |  |  | 22 | 1.600 | 0.100 | 26.13 |  |  |  |  |  |  |  |  |  | Non-evaluable evidence |
| Acute Periodontitis | Ying/2024 | finn-b-K11_PERIODON_ACUTE | Finngen |  |  | 22 | 19.22 | 0.230 | 1628 |  |  |  |  |  |  |  |  |  | Non-evaluable evidence |
| Chronic Periodontitis | Ying/2024 | finn-b-K11_PERIODON_CHRON | Finngen |  |  | 22 | 0.820 | 0.110 | 5.840 |  |  |  |  |  |  |  |  |  | Non-evaluable evidence |

**Table S6. Mendelian randomization studies, meta-analysis results, and certainty of evidence ratings of general fruit and vegetable intake as exposure**

| **Exposure** | **Disease** | **Study** | **GWAS ID** | **Consortium** | **Cases** | **Non-cases** | **SNPs** | **IVW** | | |  | **Weighted median** | | |  | **MR- Egger** | | | **Evidence rating** |
| --- | --- | --- | --- | --- | --- | --- | --- | --- | --- | --- | --- | --- | --- | --- | --- | --- | --- | --- | --- |
|  |  |  |  |  |  |  |  | **OR** | **LB** | **UB** |  | **OR** | **LB** | **UB** |  | **OR** | **LB** | **UB** |  |
| **Fruit Consumers** | Colorectal Cancer | Yang/2024 | ebi-a-GCST90038686 | Finngen | 3022 | 174066 | 13 | 0.159 | 0.033 | 0.759 |  | 0.310 | 0.033 | 2.925 |  | 11.18 | 0.090 | 1386 | Suggestive evidence |
| **Vegetable Consumption** | Colorectal Cancer | Huang/2023 |  | UK Biobank | 5567 | 372016 | 12 | 1.014 | 1.000 | 1.029 |  | 1.019 | 1.000 | 1.038 |  | 1.004 | 0.974 | 1.034 | Robust evidence |
| **Fruit Consumption** | Colorectal Cancer | Huang/2023 |  | UK Biobank | 5567 | 372016 | 8 | 1.007 | 0.986 | 1.029 |  | 1.019 | 0.984 | 1.055 |  | 1.002 | 0.932 | 1.078 | Insufficient evidence |
| **Vegetable Intake** | Ulcerative Colitis | Bu/2024 | finn-b-K11_ULCER | Finngen | 4320 | 210300 | 17 | 1.742 | 0.561 | 5.415 |  | 1.129 | 0.231 | 5.512 |  | 0.000 | 0.000 | 4.953 | Insufficient evidence |
| **Fruits Intake** | Diabetes Mellitus | Muaddi/2024 |  | UK Biobank | 16183 | 320290 | 41 | 0.920 | 0.900 | 0.940 |  |  |  |  |  |  |  |  | Non-evaluable evidence |
| **Fruits Intake** | Diabetes Mellitus | Muaddi/2024 |  | Finngen | 32469 | 183185 | 41 | 0.290 | 0.150 | 0.530 |  |  |  |  |  |  |  |  | Non-evaluable evidence |
| **Vegetables Consumption (excluding legumes)** | Rheumatoid Arthritis | Julià/2021 |  |  |  |  |  | 1.030 | 0.920 | 1.170 |  |  |  |  |  |  |  |  | Non-evaluable evidence |
| **Vegetables Consumption (excluding legumes)** | Psoriatic Arthritis | Julià/2021 |  |  |  |  |  | 0.930 | 0.760 | 1.110 |  |  |  |  |  |  |  |  | Non-evaluable evidence |
| **Vegetables Consumption (excluding legumes)** | Psoriasis | Julià/2021 |  |  |  |  |  | 0.930 | 0.840 | 1.030 |  |  |  |  |  |  |  |  | Non-evaluable evidence |
| **Vegetables Consumption (excluding legumes)** | Systemic Lupus Erythematosus | Julià/2021 |  |  |  |  |  | 1.010 | 0.920 | 1.110 |  |  |  |  |  |  |  |  | Non-evaluable evidence |
| **Vegetables Consumption (excluding legumes)** | Crohn’s Disease | Julià/2021 |  |  |  |  |  | 0.730 | 0.650 | 0.800 |  |  |  |  |  |  |  |  | Non-evaluable evidence |
| **Vegetables Consumption (excluding legumes)** | Ulcerative Colitis | Julià/2021 |  |  |  |  |  | 0.980 | 0.890 | 1.090 |  |  |  |  |  |  |  |  | Non-evaluable evidence |
| **Fruit Consumption** | Rheumatoid Arthritis | Julià/2021 |  |  |  |  |  | 1.070 | 0.960 | 1.200 |  |  |  |  |  |  |  |  | Non-evaluable evidence |
| **Fruit Consumption** | Psoriatic Arthritis | Julià/2021 |  |  |  |  |  | 0.980 | 0.820 | 1.160 |  |  |  |  |  |  |  |  | Non-evaluable evidence |
| **Fruit Consumption** | Psoriasis | Julià/2021 |  |  |  |  |  | 0.890 | 0.820 | 0.980 |  |  |  |  |  |  |  |  | Non-evaluable evidence |
| **Fruit Consumption** | Systemic Lupus Erythematosus | Julià/2021 |  |  |  |  |  | 1.030 | 0.940 | 1.130 |  |  |  |  |  |  |  |  | Non-evaluable evidence |
| **Fruit Consumption** | Crohn’s Disease | Julià/2021 |  |  |  |  |  | 0.830 | 0.750 | 0.910 |  |  |  |  |  |  |  |  | Non-evaluable evidence |
| **Fruit Consumption** | Ulcerative Colitis | Julià/2021 |  |  |  |  |  | 1.100 | 0.990 | 1.220 |  |  |  |  |  |  |  |  | Non-evaluable evidence |

**Table S7. Quality assessment results of included Mendelian randomization studies**

| **First Author/Publication Year** | **Publication Link** | **Aspect 1** | **Aspect 2** | **Aspect 3** | **Aspect 4** |
| --- | --- | --- | --- | --- | --- |
| Guo/2024 | <https://doi.org/10.3389/fpsyt.2024.1343132> | Yes | Yes | No | Yes |
| Lin/2023 | <https://doi.org/10.1186/s40246-023-00523-2> | Yes | Yes | Yes | Yes |
| Zhou/2023 | <https://doi.org/10.3390/nu15173709> | Yes | Yes | Yes | Yes |
| Zou/2023 | <https://doi.org/10.1371/journal.pone.0292113> | Yes | Yes | Yes | Yes |
| Liu/2024b | <https://doi.org/10.12998/wjcc.v12.i14.2370> | Yes | Yes | Yes | Yes |
| Muaddi/2024 | <https://doi.org/10.7759/cureus.59034> | No | No | No | No |
| Ou/2024 | <https://doi.org/10.3390/foods13081269> | Yes | Yes | Yes | Yes |
| He/2024 | <https://doi.org/10.1186/s12920-023-01782-7> | Yes | Yes | No | No |
| Junhai/2024 | <https://doi.org/10.1039/d3fo05273g> | Yes | Yes | Yes | Yes |
| Liao/2024 | <https://doi.org/10.14283/jpad.2024.31> | Yes | Yes | Yes | Yes |
| Zeng/2024 | <https://doi.org/10.3389/fnut.2024.1273874> | Yes | Yes | No | Yes |
| Zhang/2024 | <https://doi.org/10.3389/fnut.2024.1388732> | Yes | Yes | No | Yes |
| Ying/2024 | <https://doi.org/10.1177/23800844241247485> | No | Yes | Yes | No |
| Chen/2024 | <https://doi.org/10.3389/fendo.2024.1376800> | Yes | Yes | Yes | Yes |
| Julià/2021 | <https://doi.org/10.1038/s41430-021-00913-6> | No | No | No | No |
| Jin/2022 | <https://doi.org/10.3389/fnut.2022.899137> | No | Yes | Yes | Yes |
| Huang/2023 | <https://doi.org/10.3389/fnut.2023.1161175> | Yes | Yes | Yes | Yes |
| Feng/2023 | <https://doi.org/10.3390/nu15173682> | Yes | Yes | Yes | No |
| Wang/2023 | <https://doi.org/10.1038/s41598-023-36372-1> | Yes | Yes | No | Yes |
| Wang/2023b | <https://doi.org/10.3389/fnut.2023.1215220> | Yes | Yes | No | Yes |
| Xie/2023 | <https://doi.org/10.3389/fnut.2023.1278079> | Yes | Yes | Yes | No |
| Xu/2022 | <https://doi.org/10.3390/nu14132656> | No | Yes | No | No |
| Yan/2023 | <https://doi.org/10.3389/fnut.2023.1149317> | Yes | Yes | Yes | Yes |
| Yan/2023b | <https://doi.org/10.3389/fpubh.2023.1276326> | No | Yes | Yes | No |
| Yang/2024 | <https://doi.org/10.3389/fonc.2024.1362269> | Yes | Yes | Yes | Yes |
| Yang/2023 | <https://doi.org/10.1097/md.0000000000036470> | Yes | Yes | No | Yes |
| Yang/2023b | <https://doi.org/10.3389/fimmu.2023.1126457> | Yes | Yes | No | Yes |
| Zeng/2023 | <https://doi.org/10.3389/fcvm.2023.1080252> | Yes | Yes | Yes | Yes |
| Zhan/2023 | <https://doi.org/10.3390/biology12050673> | No | Yes | Yes | Yes |
| Alyahyawi/2023 | <https://doi.org/10.7759%2Fcureus.37110> | No | No | No | No |
| Deng/2023 | <https://doi.org/10.1097%2FMD.0000000000036099> | Yes | Yes | Yes | Yes |
| Huang/2023b | <https://doi.org/10.3389/fnut.2023.1027481> | Yes | Yes | Yes | Yes |
| Jareebi/2024 | <https://doi.org/10.7759/cureus.53448> | No | No | No | No |
| Lai/2023 | <https://doi.org/10.1038/s41598-023-50055-x> | Yes | Yes | Yes | Yes |
| Li/2024 | <https://doi.org/10.1002/fsn3.3931> | Yes | Yes | No | Yes |
| Li/2024b | <https://doi.org/10.3389/fnut.2024.1210855> | Yes | Yes | Yes | Yes |
| Li/2024c | <https://doi.org/10.1017/s0007114523002556> | Yes | Yes | No | Yes |
| Liao/2023 | <https://doi.org/10.21203/rs.3.rs-3250514/v1> | Yes | Yes | Yes | Yes |
| Liu/2024 | <https://doi.org/10.1007/s00586-023-07970-4> | Yes | Yes | No | Yes |
| Liu/2023 | <https://doi.org/10.3389/fnut.2023.1123657> | Yes | Yes | No | No |
| Liu/2023b | <https://doi.org/10.3389/fnut.2024.1276497> | Yes | Yes | Yes | Yes |
| Lv/2024 | <https://doi.org/10.1371/journal.pone.0297269> | Yes | Yes | Yes | Yes |
| Mao/2023 | <https://doi.org/10.3390/nu15051153> | Yes | Yes | Yes | Yes |
| Pan/2024 | <https://doi.org/10.1097/md.0000000000037254> | Yes | Yes | No | Yes |
| Bu/2024 | <https://doi.org/10.6133/apjcn.202406_33(2).0010> | Yes | Yes | No | Yes |
| Wang/2024 | <https://doi.org/10.1007/s00403-024-03103-z> | Yes | Yes | No | No |
| Xie/2024 | <https://doi.org/10.1016/j.ypmed.2024.108033> | No | Yes | No | No |
| Xie/2024b | <https://doi.org/10.3389/fnut.2024.1377631> | Yes | Yes | Yes | Yes |
| Yang/2024b | <https://doi.org/10.3389/fnut.2024.1265920> | Yes | Yes | No | Yes |
| Guan/2024 | <https://doi.org/10.1186/s12986-024-00813-z> | Yes | Yes | Yes | Yes |
| Jing/2024 | <https://doi.org/10.1097/md.0000000000038473> | Yes | Yes | Yes | Yes |
| Li/2024 | <https://doi.org/10.3389/fpsyt.2024.1388316> | Yes | Yes | Yes | Yes |
| Liang/2024 | <https://doi.org/10.1097/md.0000000000037710> | Yes | Yes | No | Yes |
| Cai/2024 | <https://doi.org/10.1186/s41043-024-00575-7> | Yes | Yes | No | Yes |
